# Supplementary material for: Tuning the optical and electrochemical properties of core-substituted naphthalenediimides with styryl imide substituent
Source: Royal Society of Chemistry journal article supplement (doi:10.1039/c4nj01645a), 2015-01-01
Supplement: c4nj01645a1.pdf [file c4nj01645a1.pdf]

## Supporting Information

### **Tuning the optical and electrochemical properties of core-substituted naphthalenediimides with styryl imide substituent**

Roshan Fernando, Forrest Etheridge, Evan Muller and Geneviève Sauvé\*

Department of Chemistry, Case Western Reserve University, Cleveland, Ohio 44106

Cleveland, Ohio 44106

Email: [genevieve.sauve@case.edu](mailto:genevieve.sauve@case.edu)

### Table of Contents

|                                                    |            |
|----------------------------------------------------|------------|
| <b>Chan-Lam coupling reaction conditions .....</b> | <b>S2</b>  |
| <b><sup>1</sup>H-NMR Spectra.....</b>              | <b>S3</b>  |
| <b>MALDI-TOF-Mass Spectra .....</b>                | <b>S11</b> |
| <b>UV-visible emission spectra .....</b>           | <b>S17</b> |
| <b>Scattering correction .....</b>                 | <b>S18</b> |
| <b>Computational data.....</b>                     | <b>S21</b> |

**Table S1:** Reaction conditions tested for Chan-Lam coupling reaction of RF8H with trans-phenylvinylboronic acid

| Entry          | Catalyst             | Additive            | Solvent / Temperature      | Yield (%)   |
|----------------|----------------------|---------------------|----------------------------|-------------|
| 1              | Cu(OAc) <sub>2</sub> | Et <sub>3</sub> N   | CHCl <sub>3</sub> / 65 °C  | 8.6         |
| 2              | Cu(OAc) <sub>2</sub> | Et <sub>3</sub> N   | THF / 70 °C                | 10          |
| 3              | Cu(OAc) <sub>2</sub> | Pyridine            | Toluene / 110 °C           | No reaction |
| 4 <sup>a</sup> | Cu(OAc) <sub>2</sub> | Pyridine            | DMAc / 110 °C              | 13          |
| 5              | Cu(OAc) <sub>2</sub> | Et <sub>3</sub> N   | Ethyl acetate / 70 °C      | No reaction |
| 6 <sup>a</sup> | Cu(OAc) <sub>2</sub> | Et <sub>3</sub> N   | Dioxane / 70 °C            | 12.5        |
| 7              | Cu(OTf) <sub>2</sub> | Et <sub>3</sub> N   | THF / 70 °C                | No reaction |
| 8              | Cu(OTf) <sub>2</sub> | 1,10-phenanthroline | CHCl <sub>3</sub> / 60 °C  | No reaction |
| 9              | Cu(OTf) <sub>2</sub> | No additive         | Dioxane / 70 °C            | No reaction |
| 10             | Cu(OAc) <sub>2</sub> | No additive         | THF: dioxane (3:1) / 70 °C | No reaction |
| 11             | Cu(OTf) <sub>2</sub> | Et <sub>3</sub> N   | Dioxane / 70 °C            | No reaction |
| 12             | Cu(OAc) <sub>2</sub> | Urea                | Dioxane / 70 °C            | No reaction |
| 13             | Cu(OAc) <sub>2</sub> | Urea                | Dioxane / 70 °C            | No reaction |

a. reaction time 7 days with three time addition of reactants

*Note: reactant ratio imide: boronic acid: catalyst: additive is 1:2.5:2.5 and reaction time is 48 hrs except for entries 4 and 6. The second portion (same initial amounts) of reactants (boronic acid, catalyst and additive) was added after 24 hrs. For entries 4 and 6 the third portion was added after 4 days.*

# $^1\text{H}$ NMR spectra

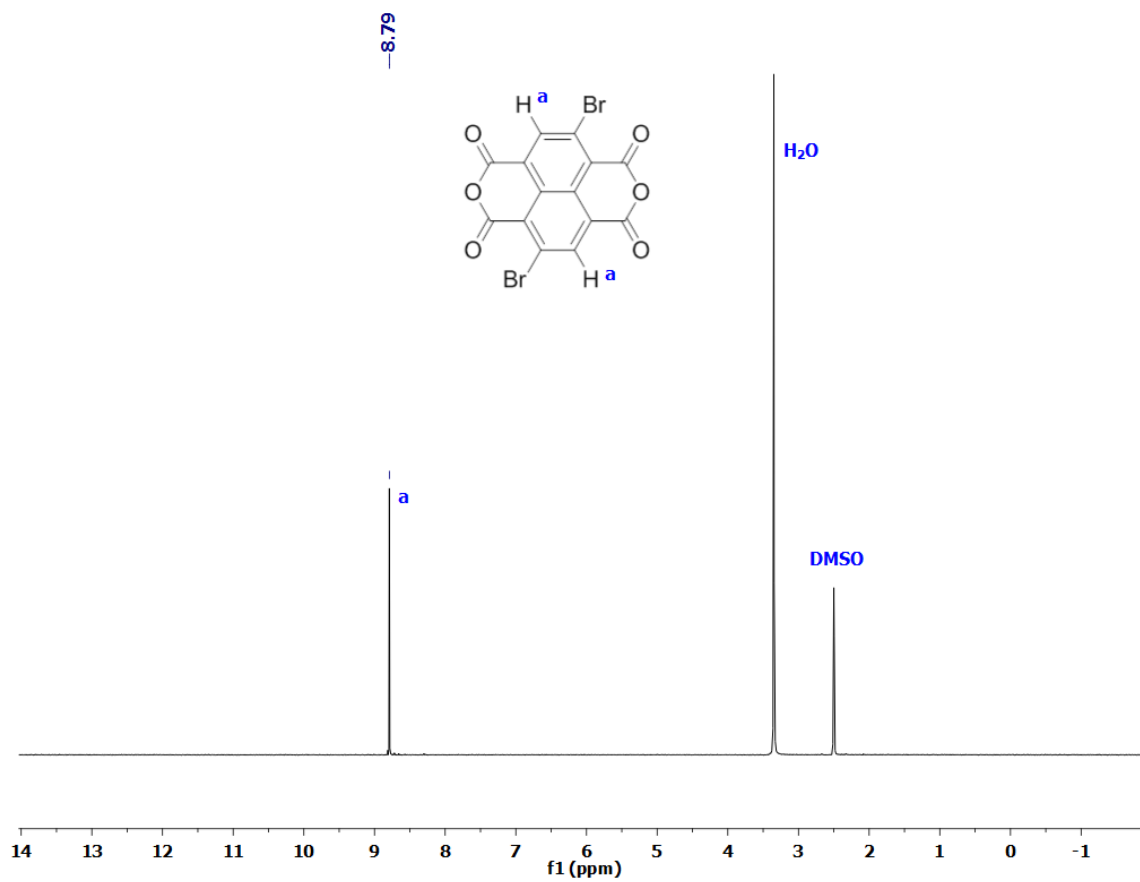

**Figure S1:**  $^1\text{H}$  NMR Spectrum (400 MHz,  $d^6$ -DMSO) of **26BrNDA**.

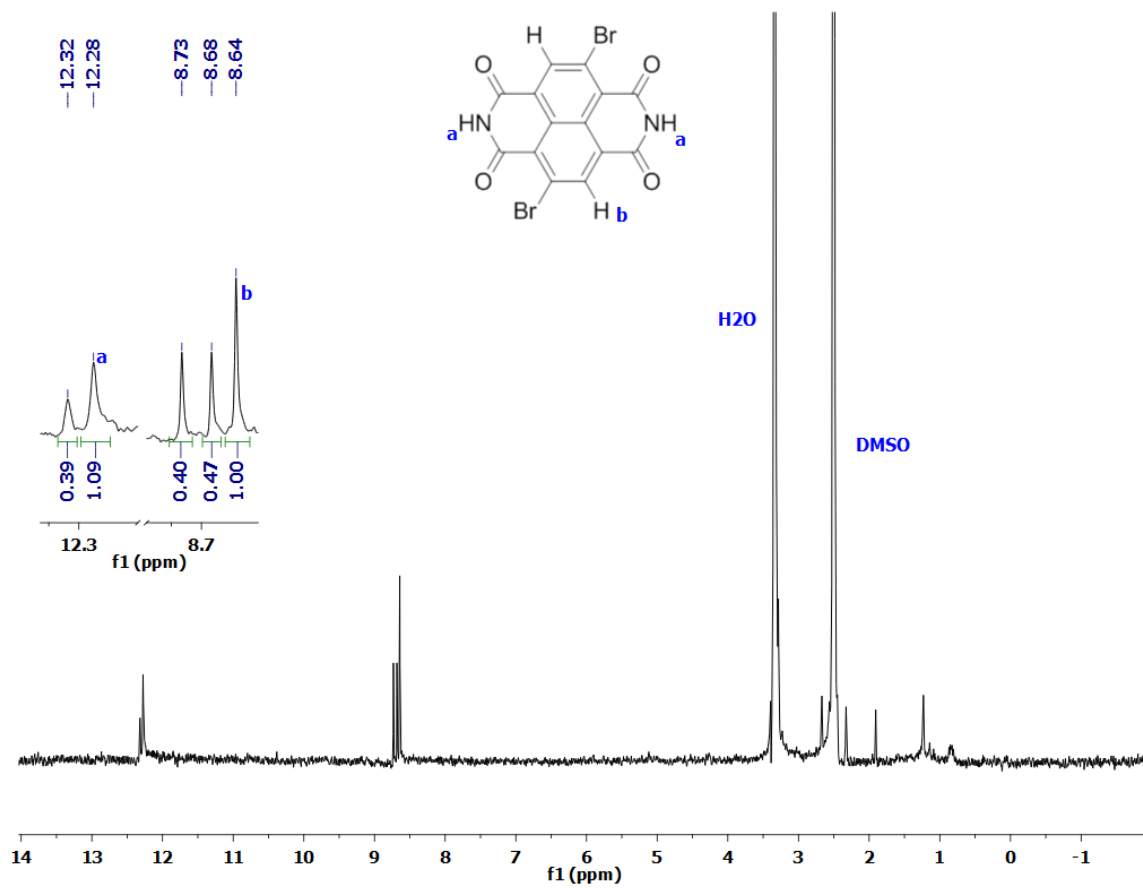

Figure S2: <sup>1</sup>H NMR Spectrum (400 MHz, *d*<sup>6</sup>-DMSO) of 26BrNDI.

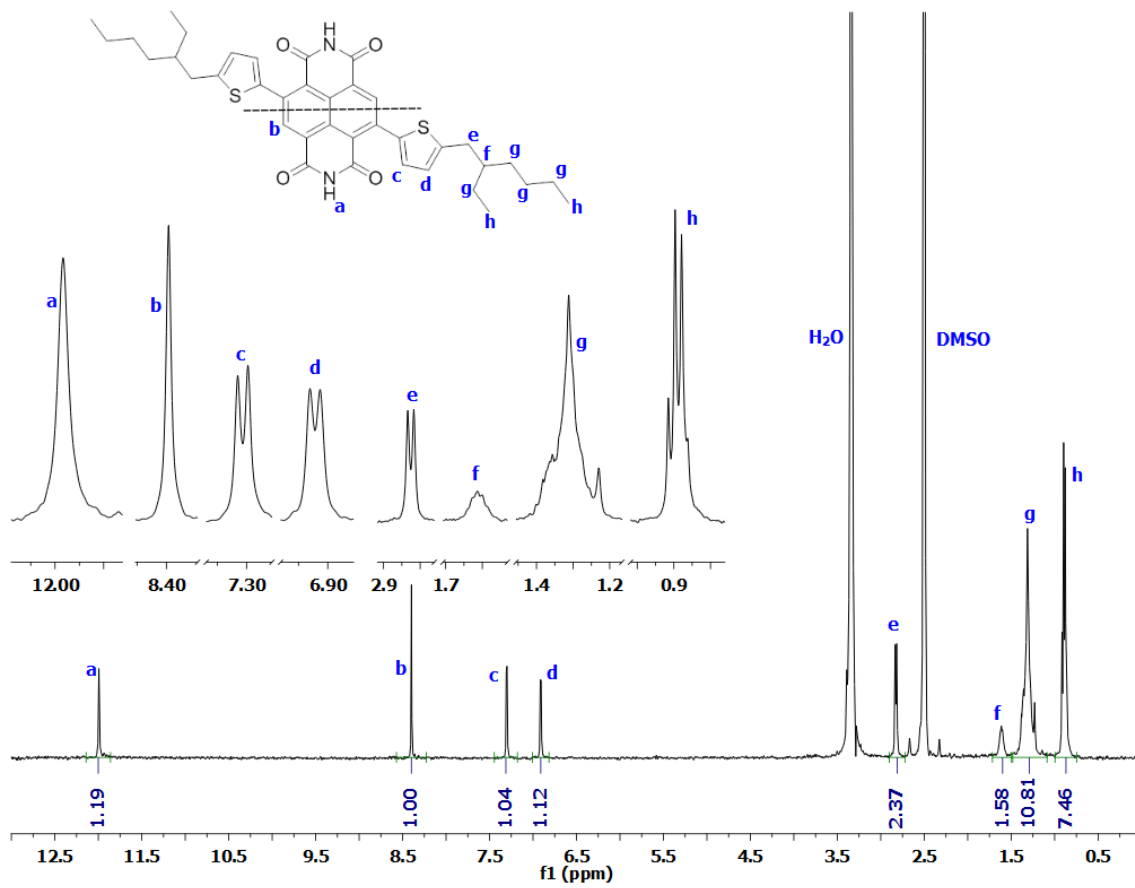

**Figure S3:** <sup>1</sup>H NMR Spectrum (400 MHz, *d*<sup>6</sup>-DMSO) of **RF7H**.

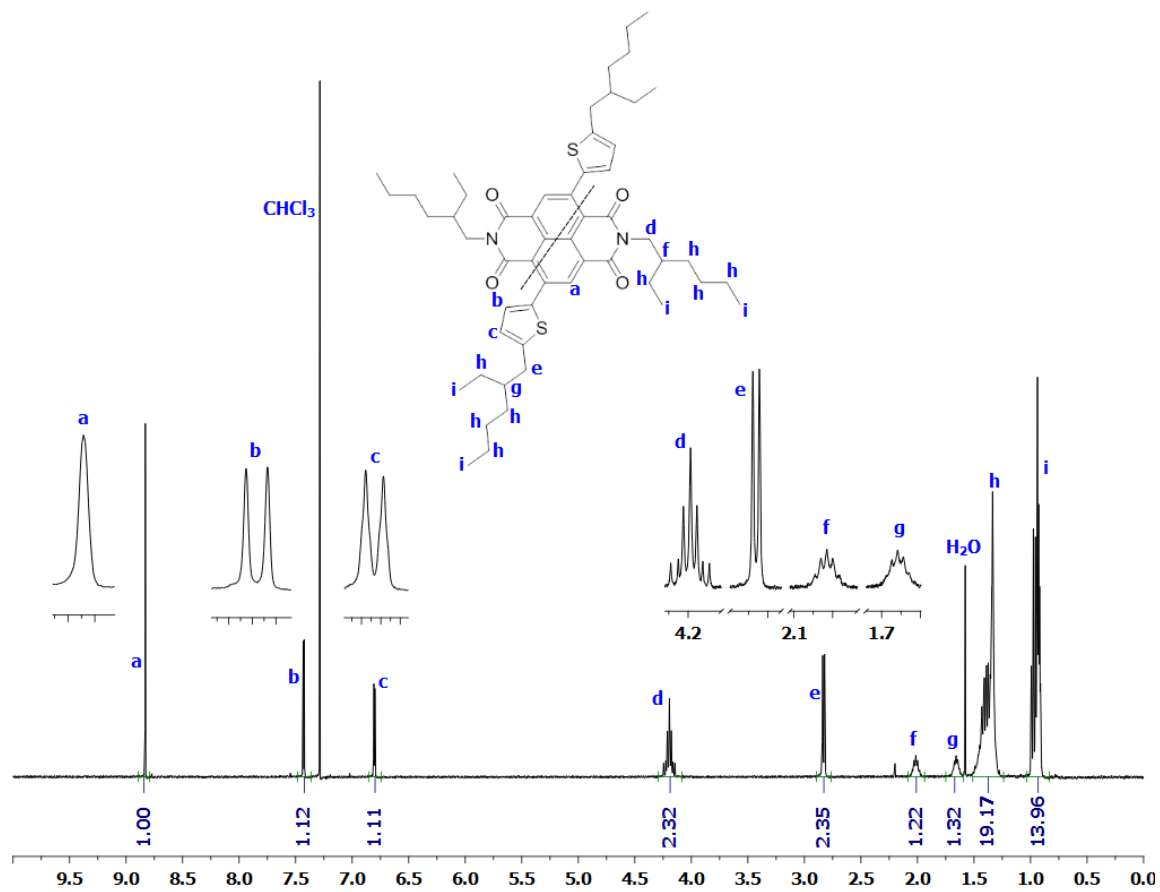

**Figure S4:**  $^1\text{H}$  NMR Spectrum (400 MHz,  $\text{CDCl}_3$ ) of **RF7a**.

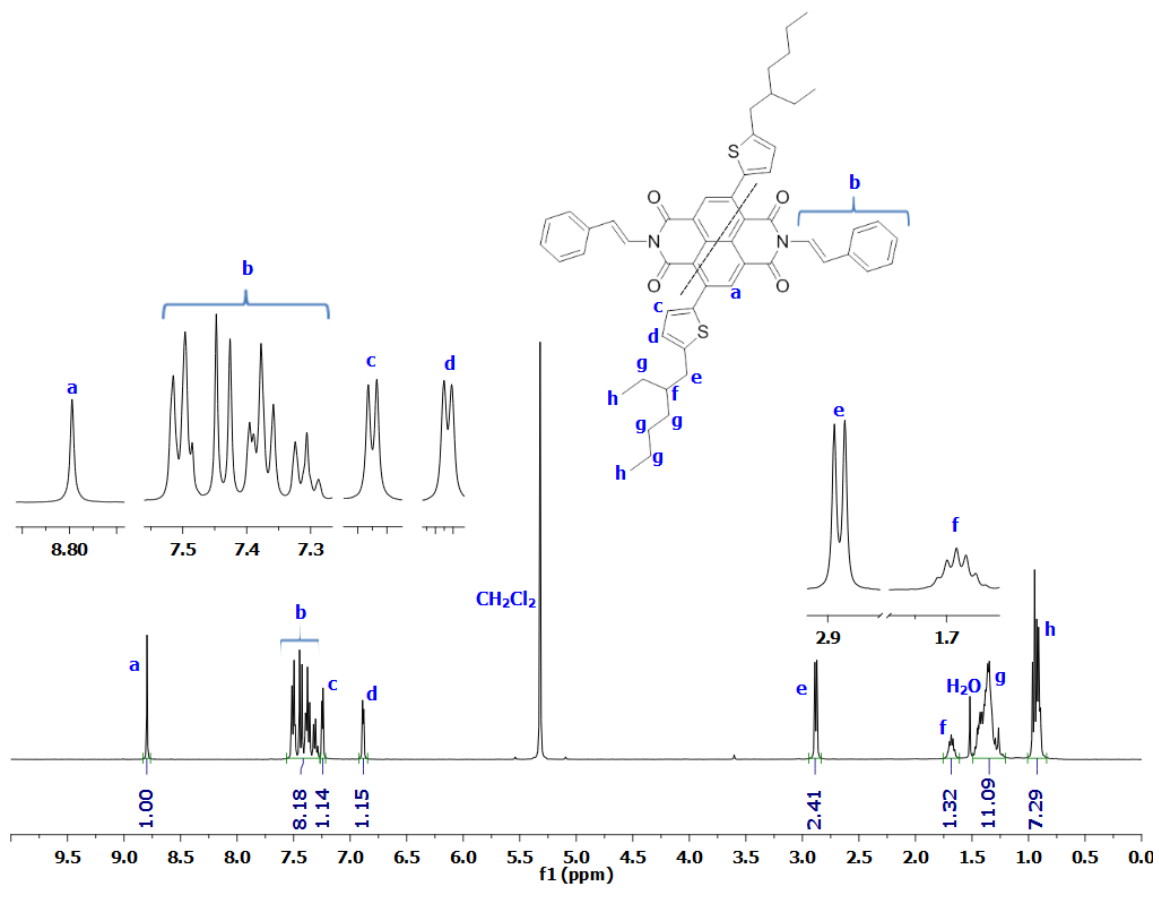

**Figure S5:** <sup>1</sup>H NMR Spectrum (400 MHz, CD<sub>2</sub>Cl<sub>2</sub>) of **RF7b**.

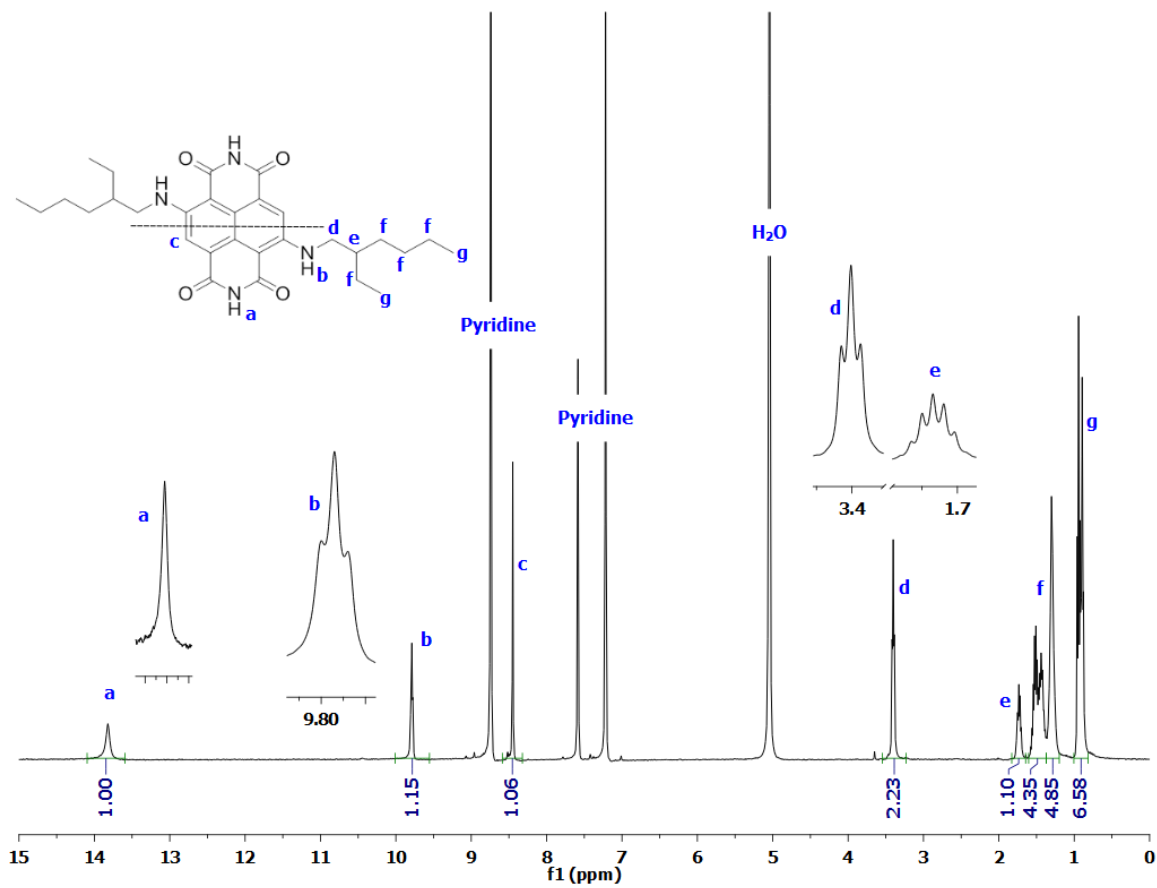

**Figure S6:** <sup>1</sup>H NMR Spectrum (400 MHz, d<sup>5</sup>-pyridine) of **RF8H**.



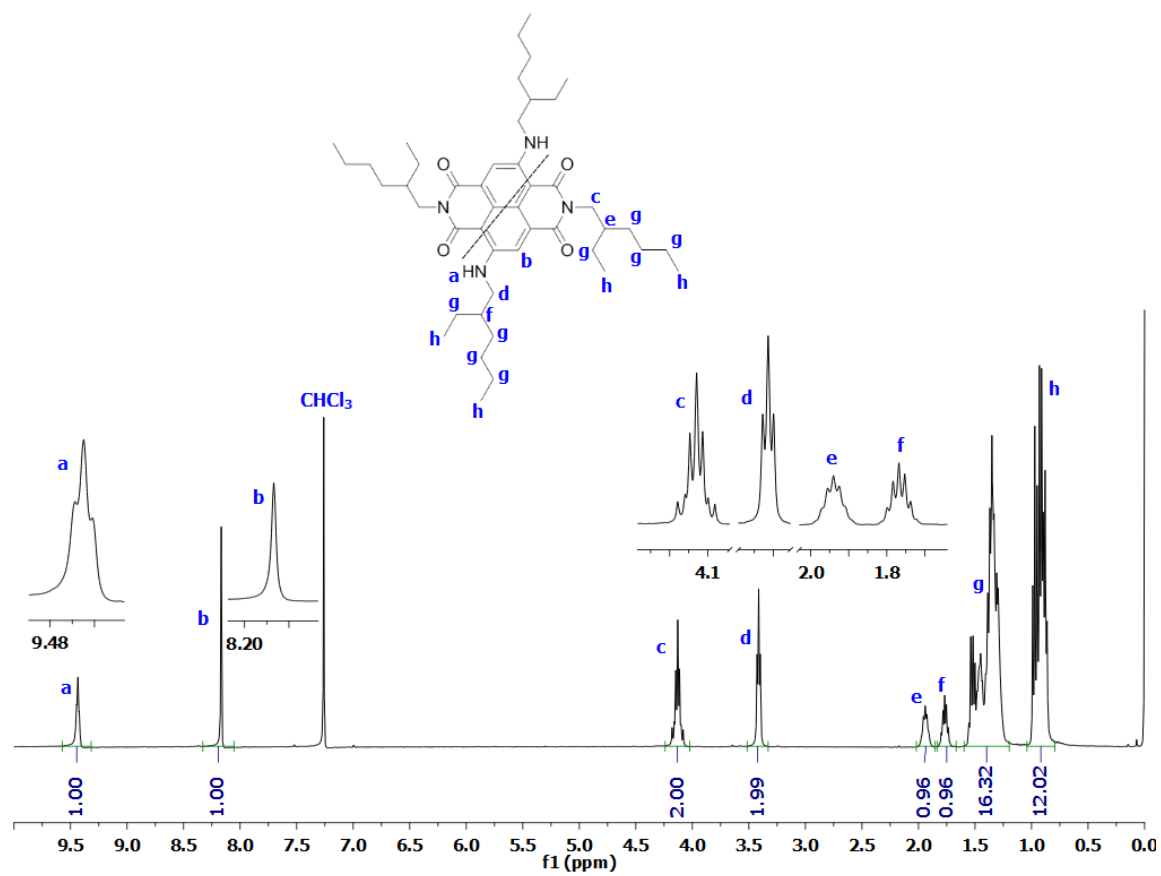

**Figure S7:**  $^1\text{H}$  NMR Spectrum (400 MHz,  $\text{CDCl}_3$ ) of **RF8a**.

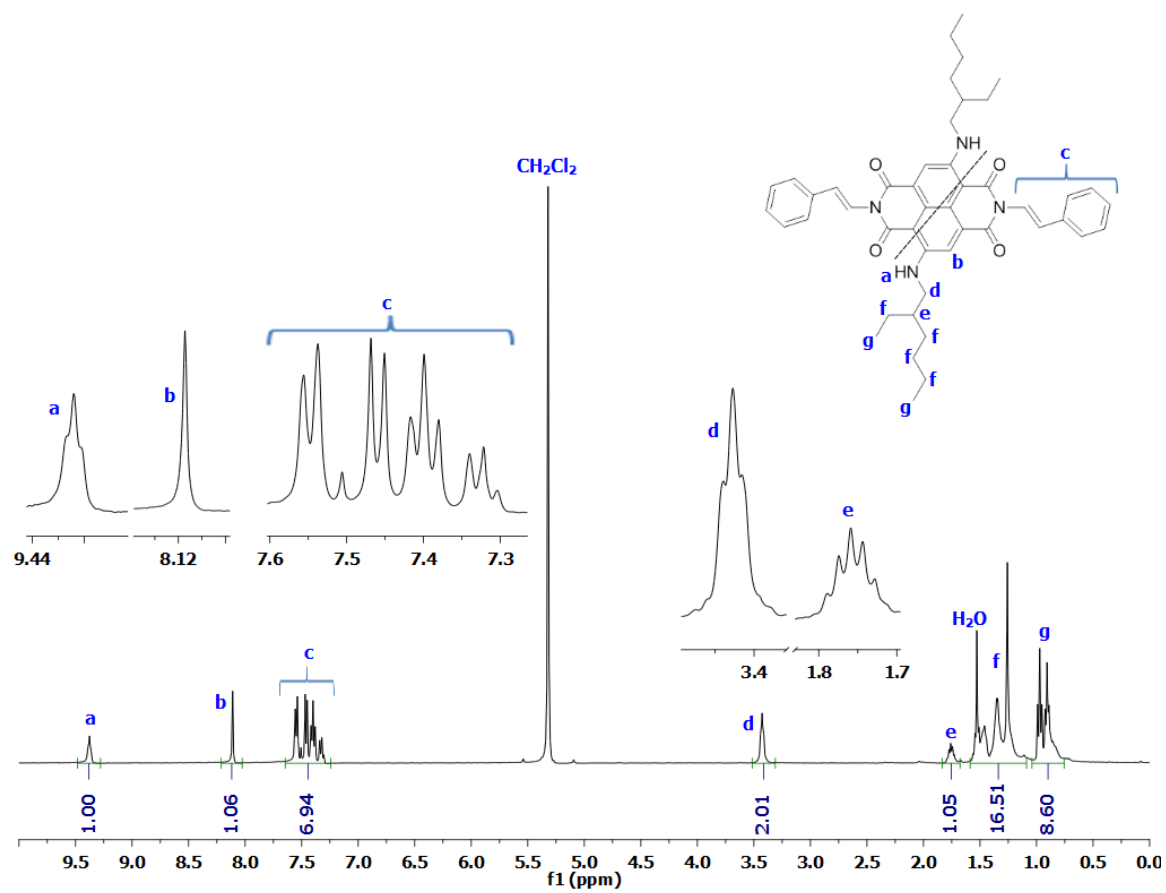

**Figure S8:** <sup>1</sup>H NMR Spectrum (400 MHz, CD<sub>2</sub>Cl<sub>2</sub>) of **RF8b**.

## MALDI-TOF Mass Spectra

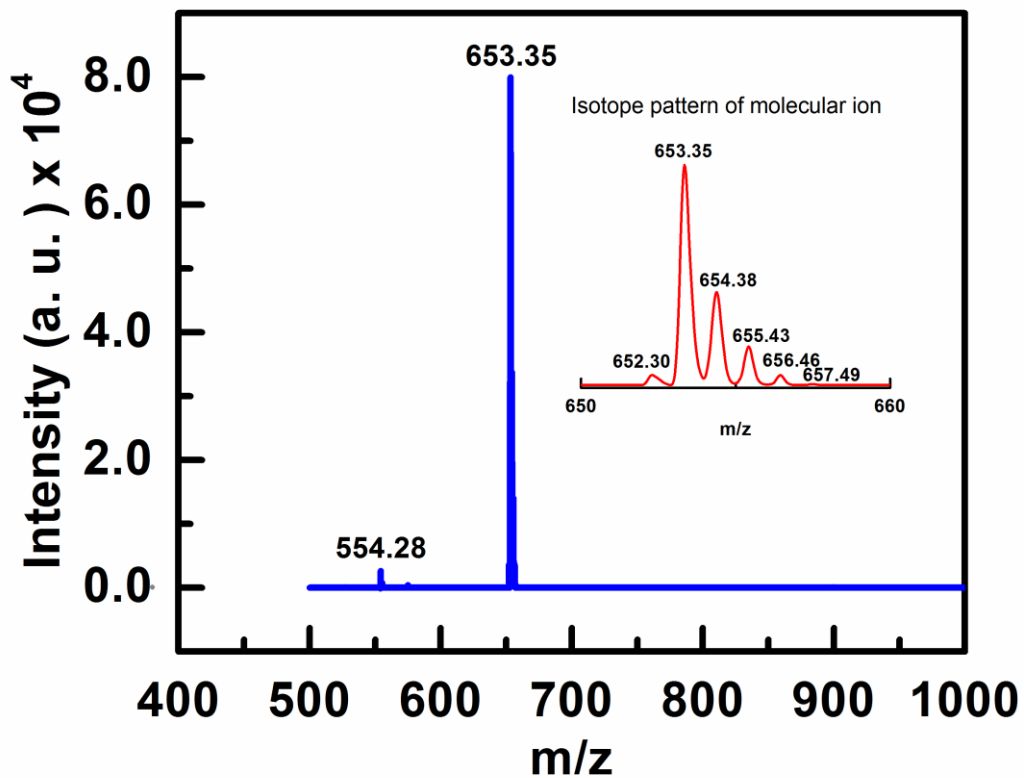

**Figure S9:** MALDI-TOF Mass Spectrum of **RF7H** (Insert: Isotope pattern of the molecular ion in reflective negative ion mode).

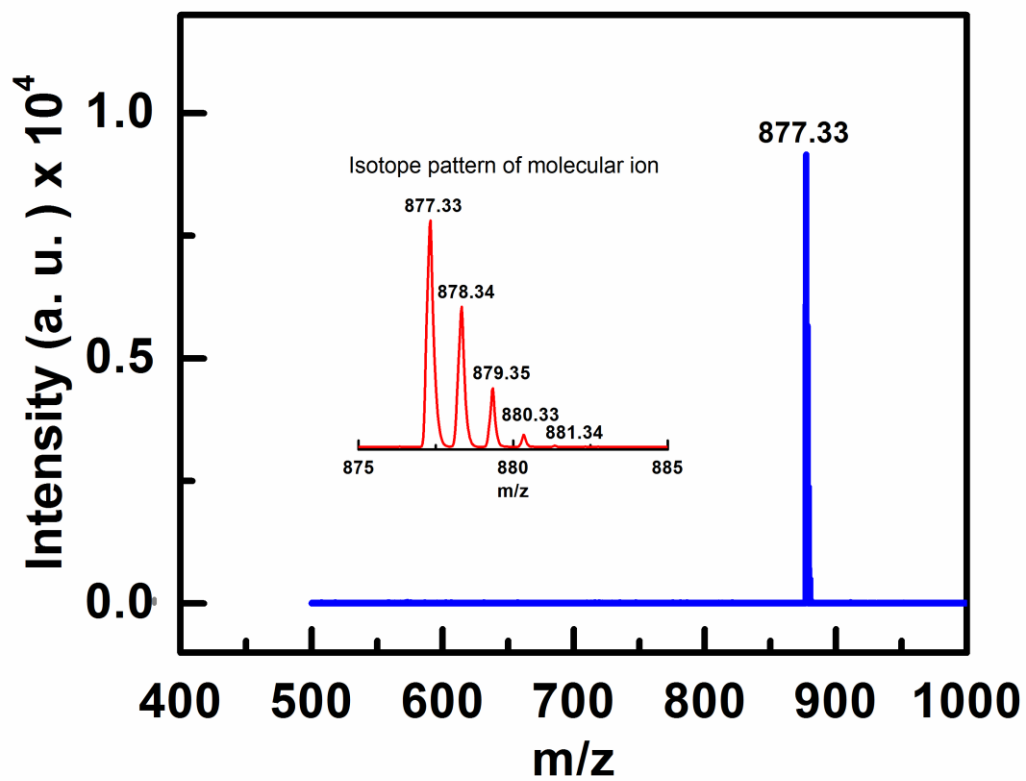

**Figure S10:** MALDI-TOF Mass Spectrum of **RF7a** (Insert: Isotope pattern of the molecular ion in reflective negative ion mode).

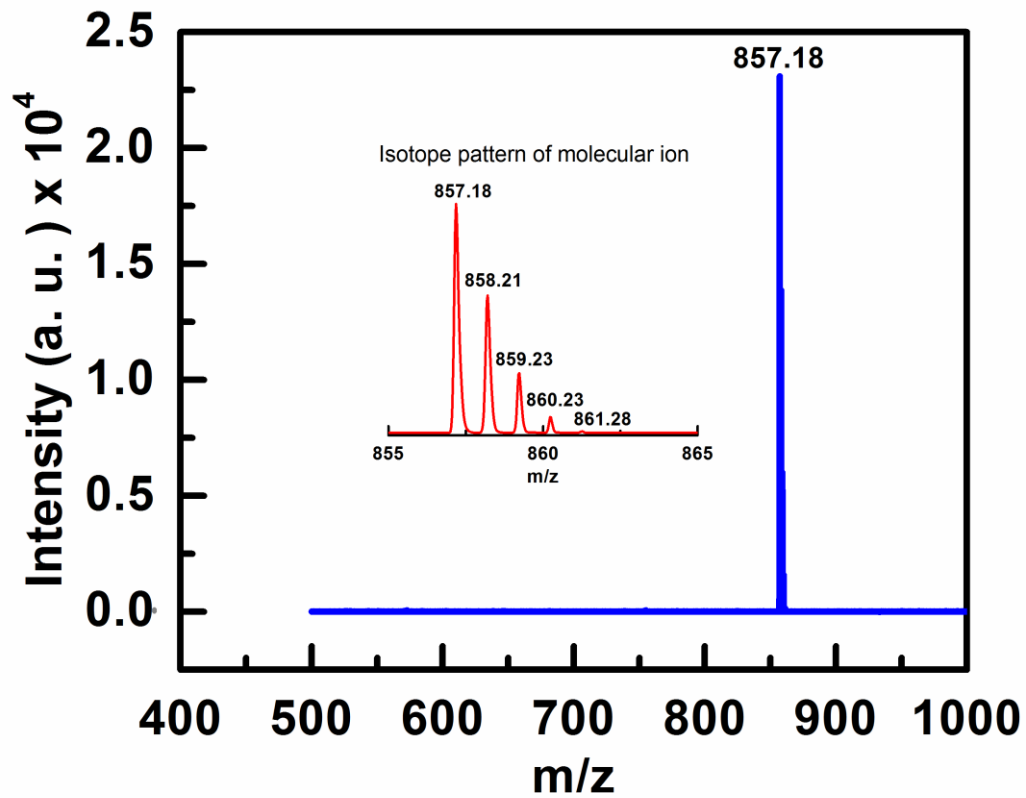

**Figure S11:** MALDI-TOF Mass Spectrum of **RF7b** (Insert: Isotope pattern of the molecular ion in reflective negative ion mode).

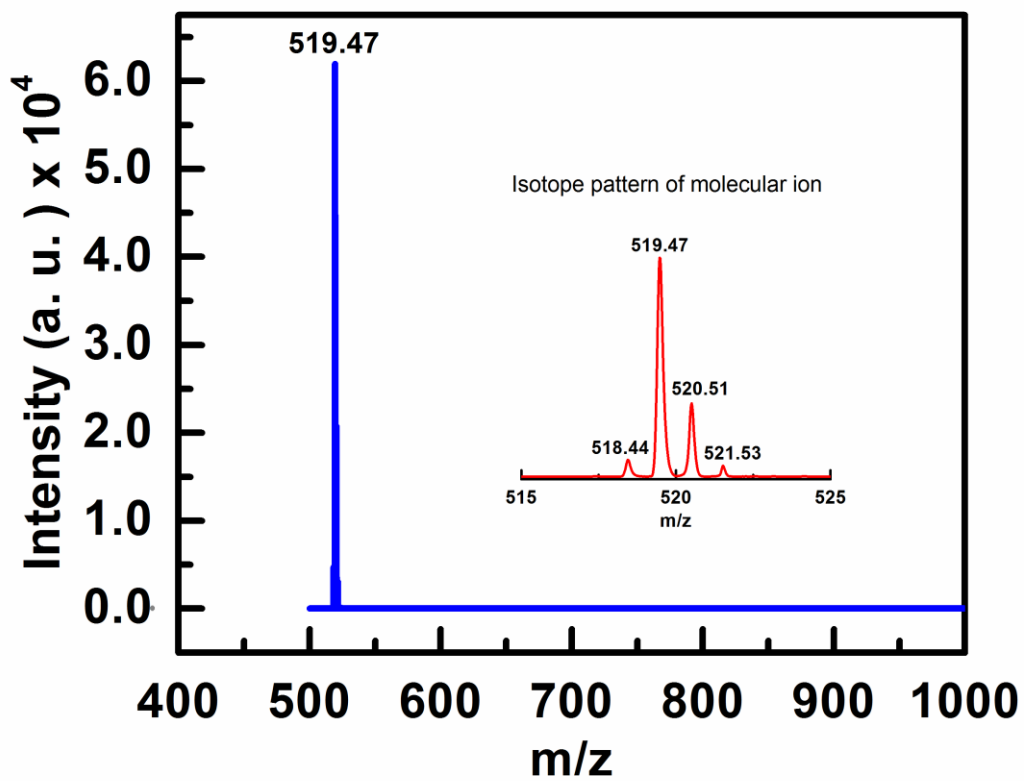

**Figure S12:** MALDI-TOF Mass Spectrum of **RF8H** (Insert: Isotope pattern of the molecular ion in reflective negative ion mode).

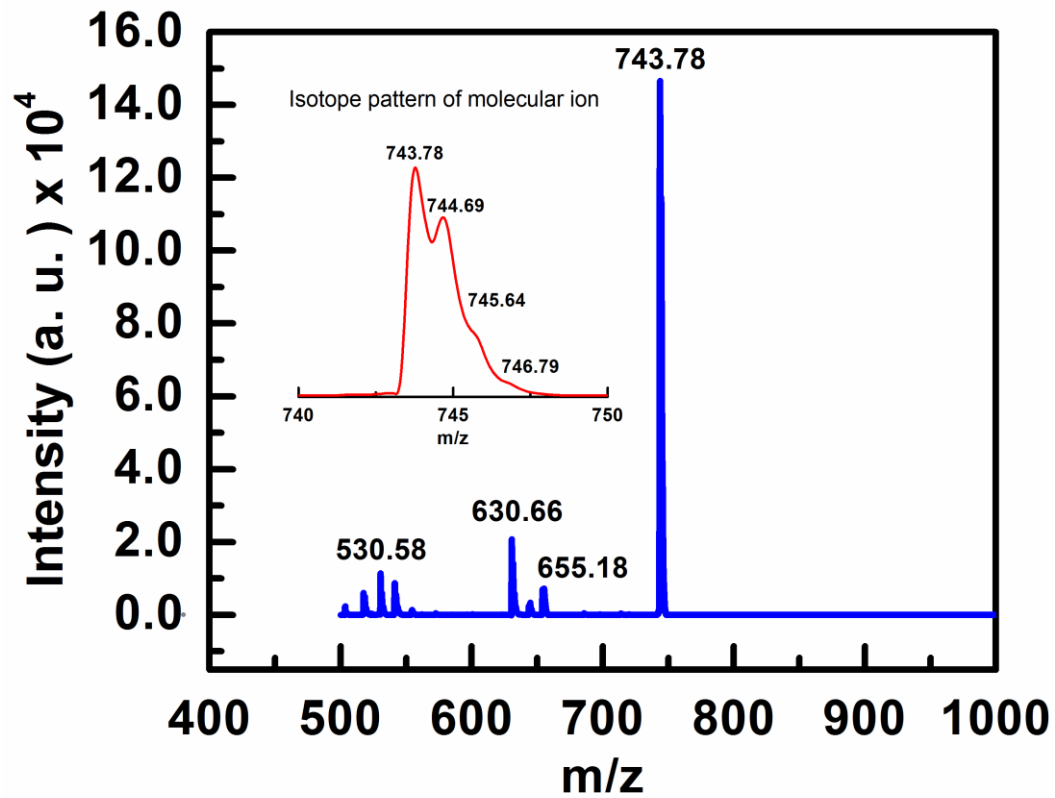

**Figure S13:** MALDI-TOF Mass Spectrum of **RF8a** (Insert: Isotope pattern of the molecular ion in reflective negative ion mode).

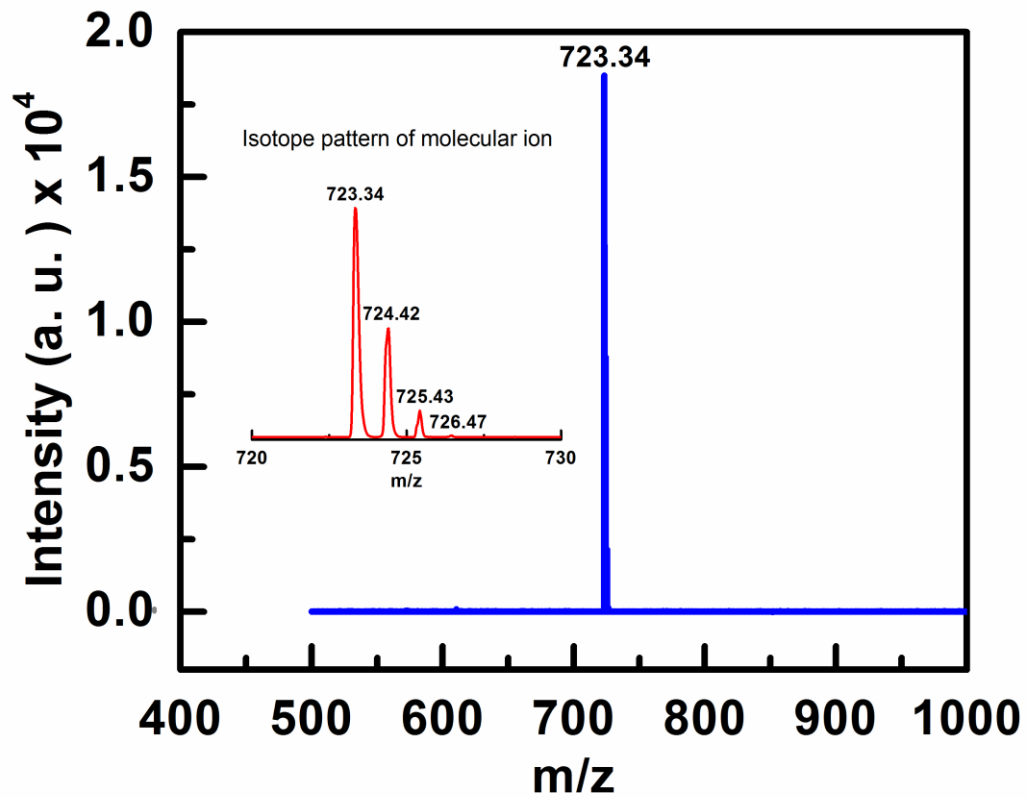

**Figure S14:** MALDI-TOF Mass Spectrum of **RF8b** (Insert: Isotope pattern of the molecular ion in reflective negative ion mode).



## UV-Visible emission spectra

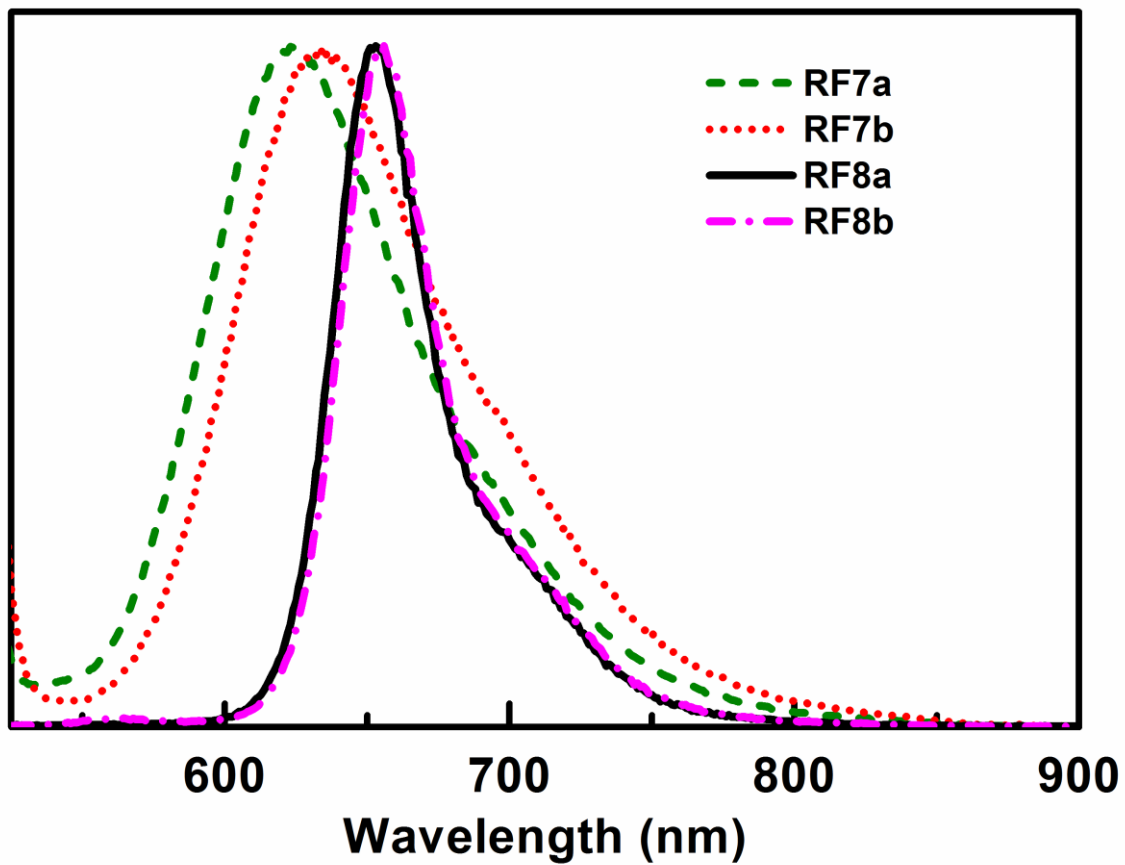

Figure S15: UV-Vis Emission Spectra of **RF7a**, **RF7b**, **RF8a** and **RF8b** in chloroform solution.

## Scattering correction for absorption spectra of films

Scattering corrections were done by using the scatter modeling method.<sup>S1</sup> In this method, a part of the uncorrected spectrum (raw data) where the absorbance is caused only due to scattering was selected. Then a polynomial (eq. 1 & 2) was fitted to this selected part using a least-squares fit to the logarithm of the absorbance.

$$A = a\lambda^n \quad \text{eq. 1}$$

$$\log(A) = n\log(\lambda) + \log(a) \quad \text{eq. 2}$$

Where: A is absorbance,  $\lambda$  is the wavelength, n is the scattering order and a is a coefficient.

Using the fit, the constants a and n were determined and then used to calculate the scattering contribution for the whole wavelength range (300 – 1000 nm). The corrected spectrum was obtained by subtracting the scattering contribution from the raw data.

Scatter contributions, raw data, and corrected spectra for the films of RF7a, RF7b, RF8a and RF8b are given below.

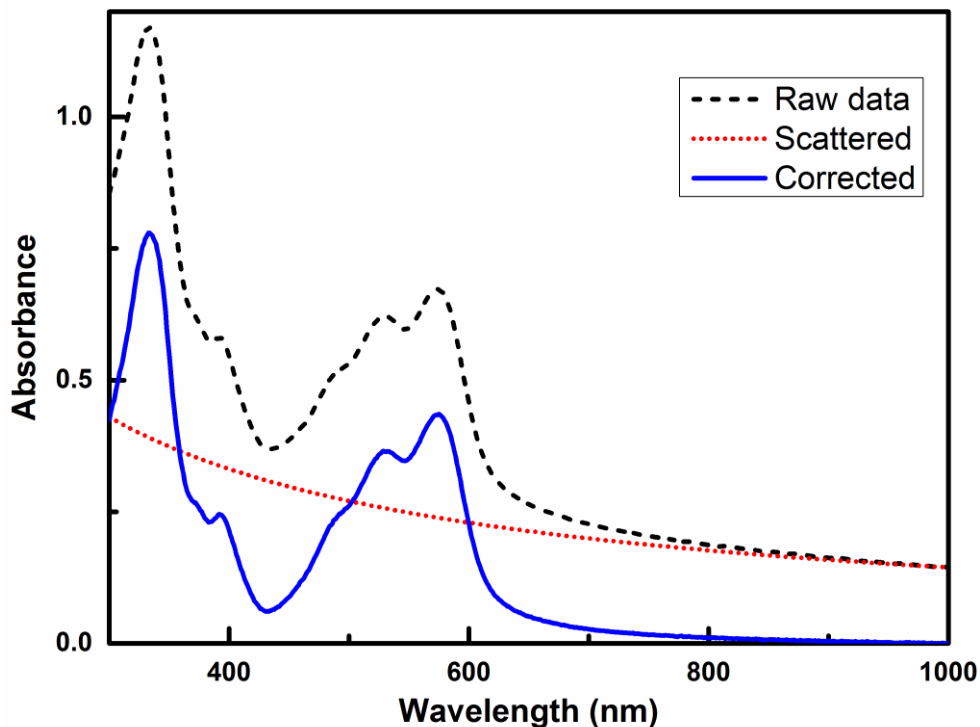

**Figure S16:** Scattering correction for absorption spectrum of **RF7a** in film.

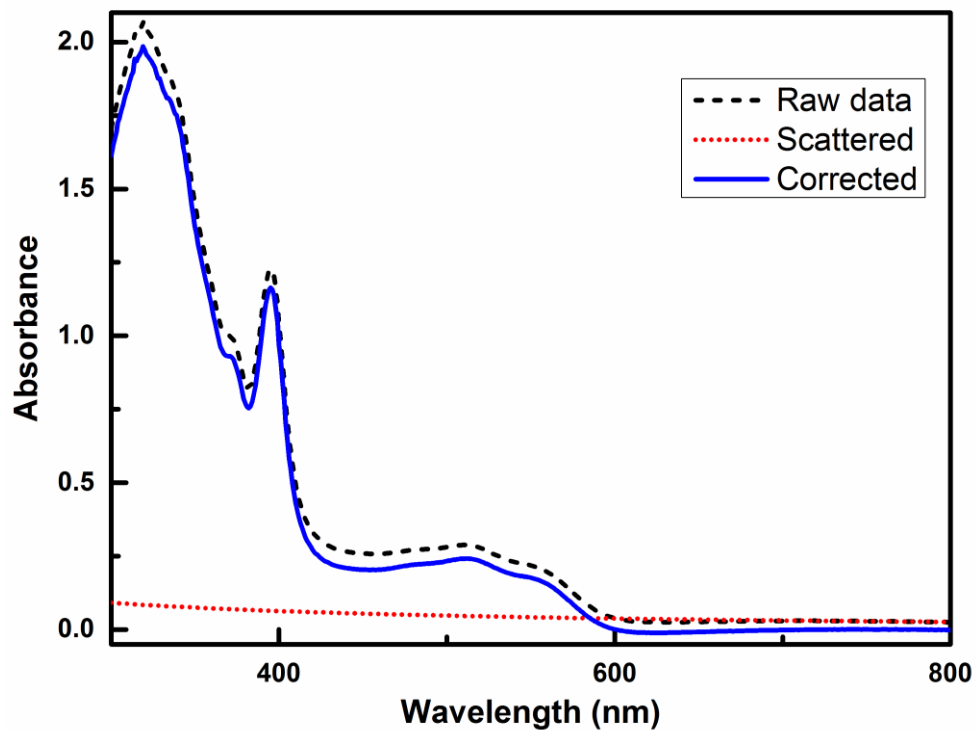

Figure S17: Scattering correction for absorption spectrum of **RF7b** in film.

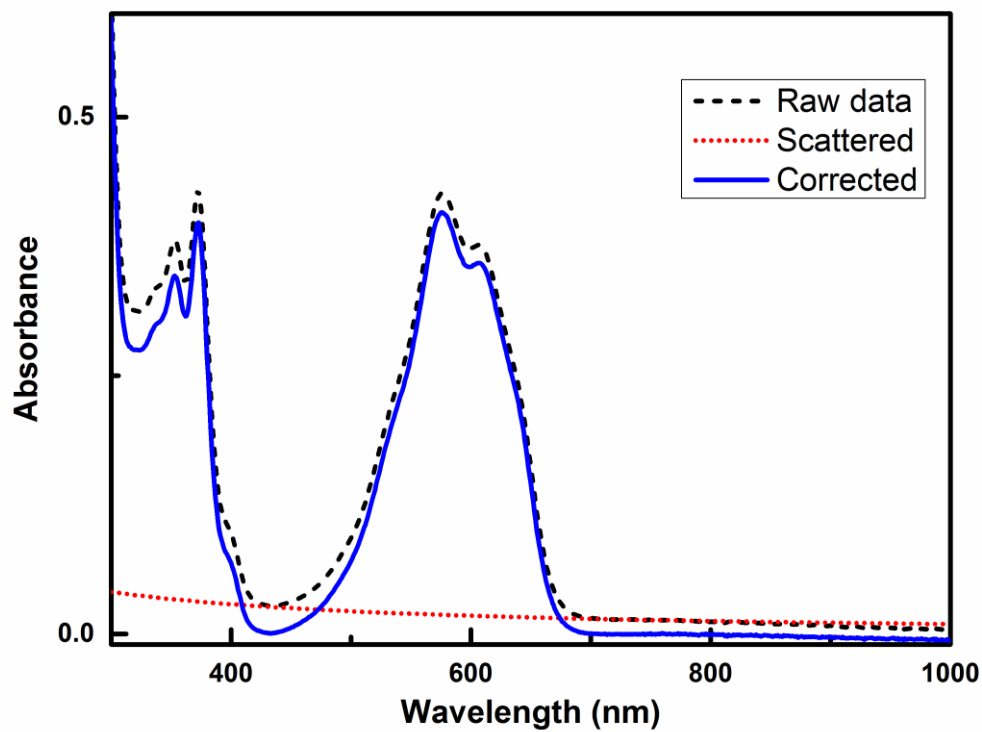

Figure S18: Scattering correction for absorption spectrum of **RF8a** in film.

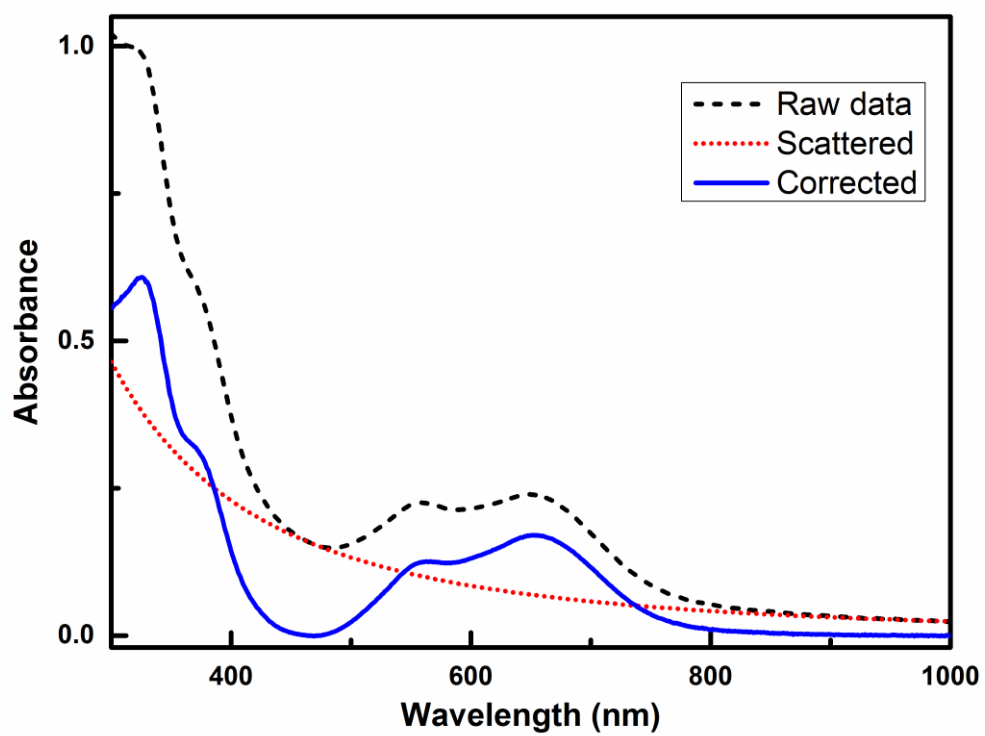

**Figure S19:** Scattering correction for absorption spectrum of **RF8b** in film.

## Computational data

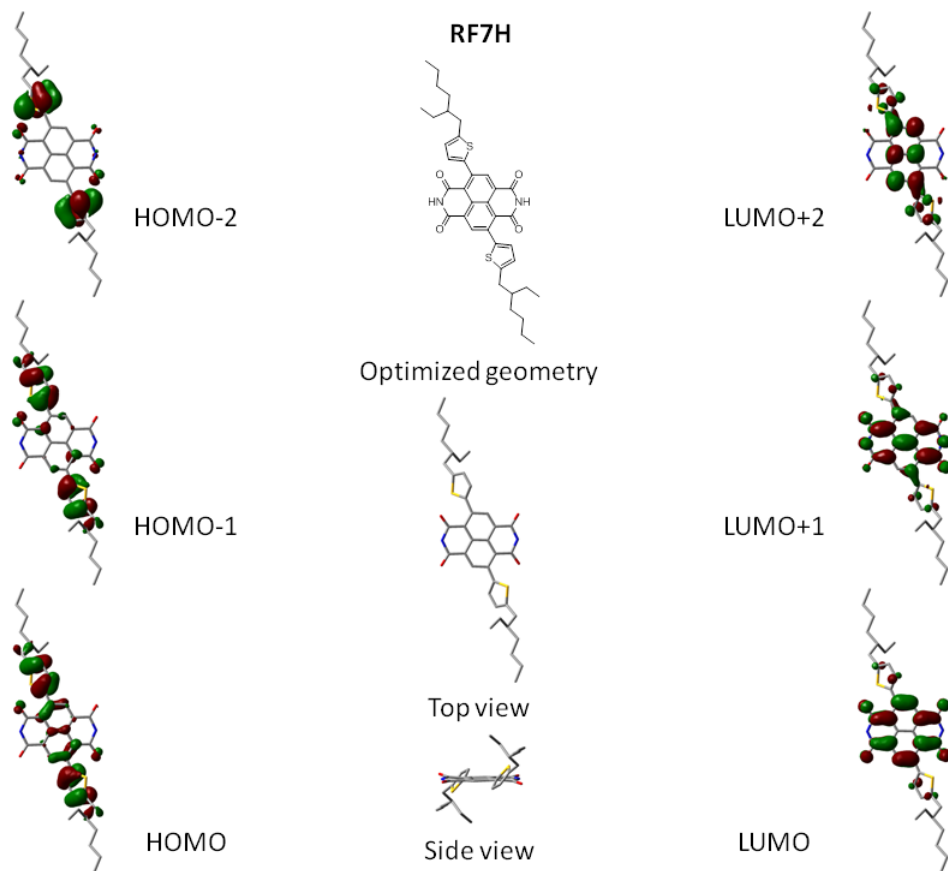

**Figure S20:** Optimized geometry and Kohn-Sham frontier molecular orbitals of local minima of **RF7H** at the B3LYP/6-31G(d,p) level of theory.

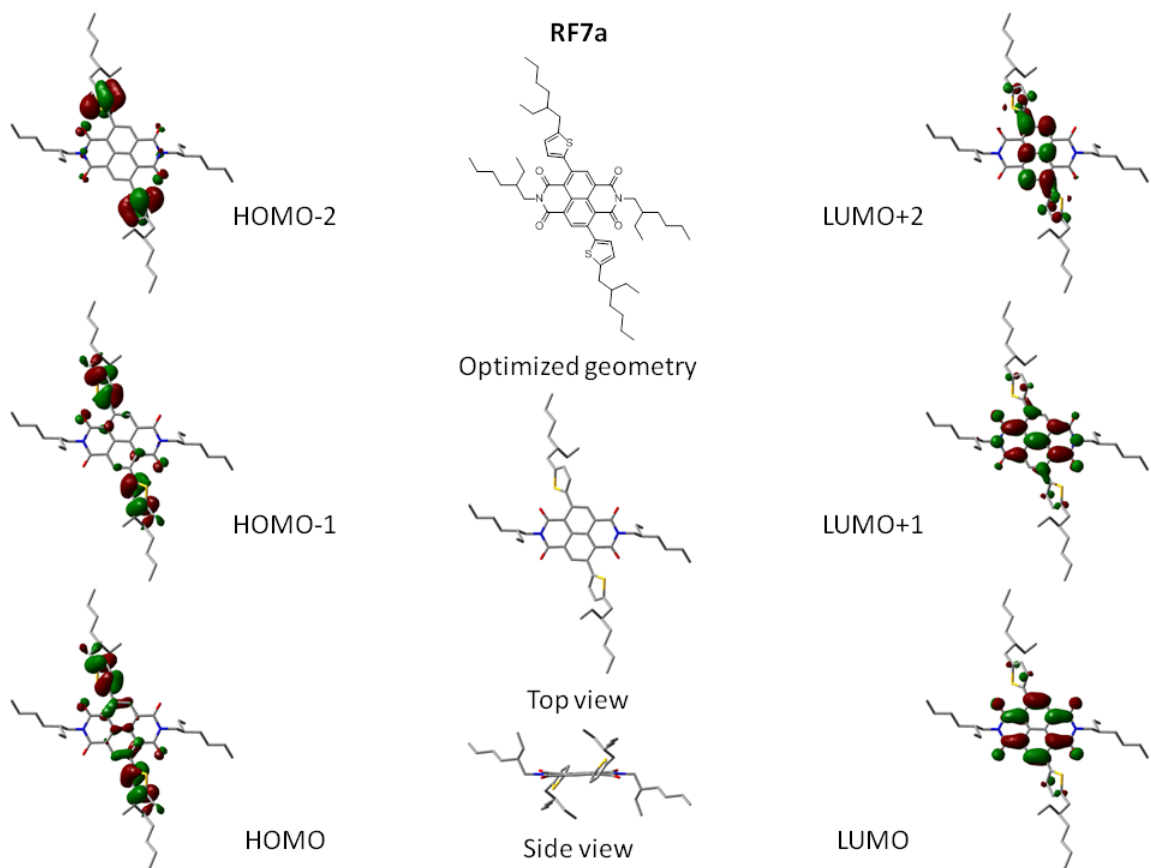

**Figure S21:** Optimized geometry and Kohn-Sham frontier molecular orbitals of local minima of **RF7a** at the B3LYP/6-31G(d,p) level of theory.

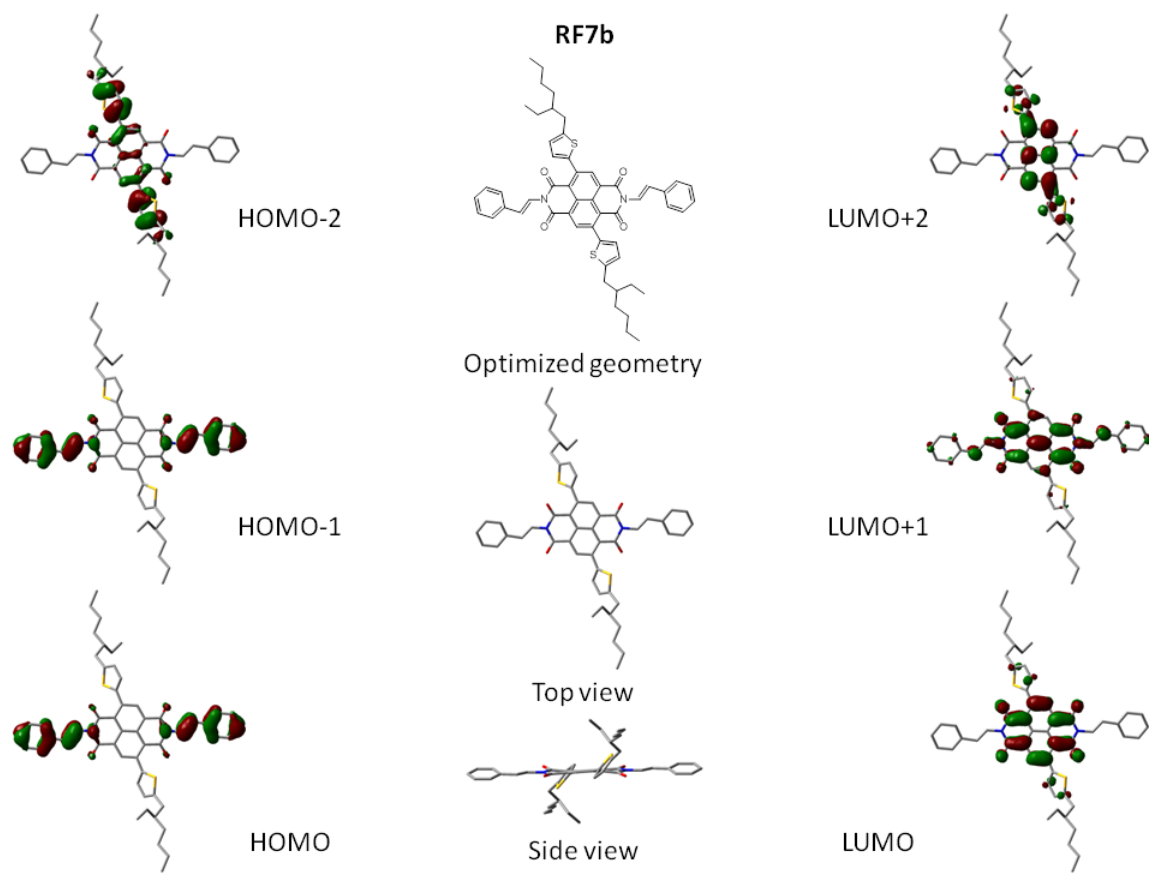

**Figure S22:** Optimized geometry and Kohn-Sham frontier molecular orbitals of local minima of **RF7b** at the B3LYP/6-31G(d,p) level of theory.

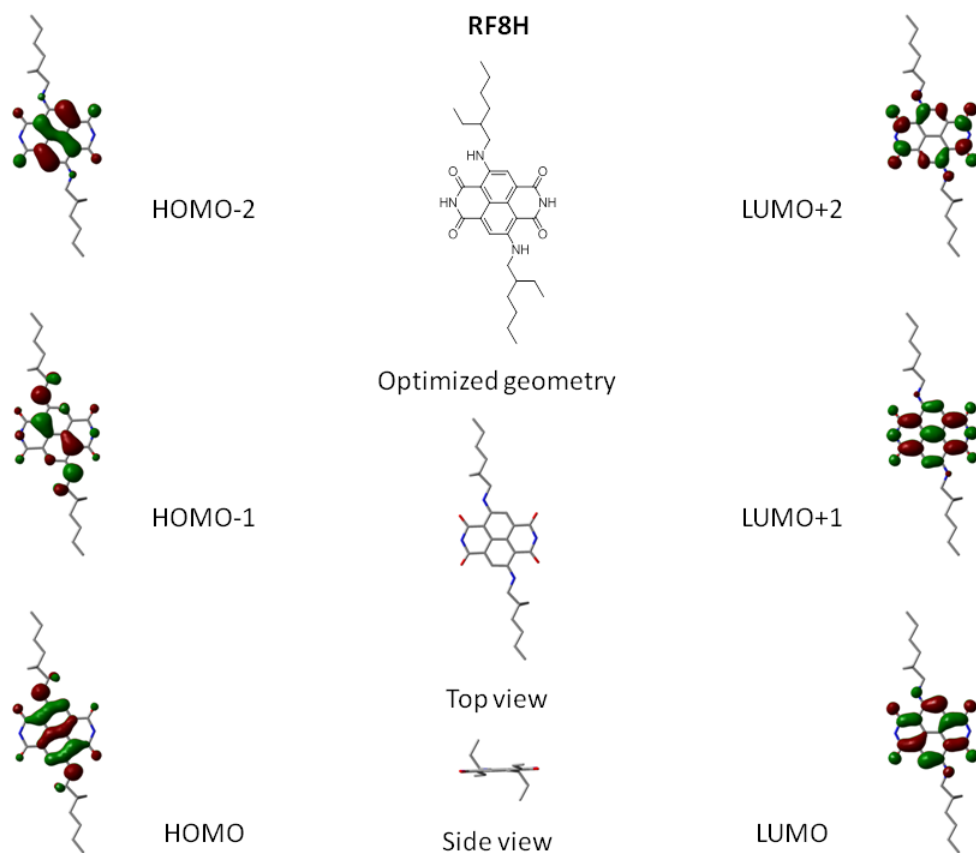

**Figure S23:** Optimized geometry and Kohn-Sham frontier molecular orbitals of local minima of **RF8H** at the B3LYP/6-31G(d,p) level of theory.



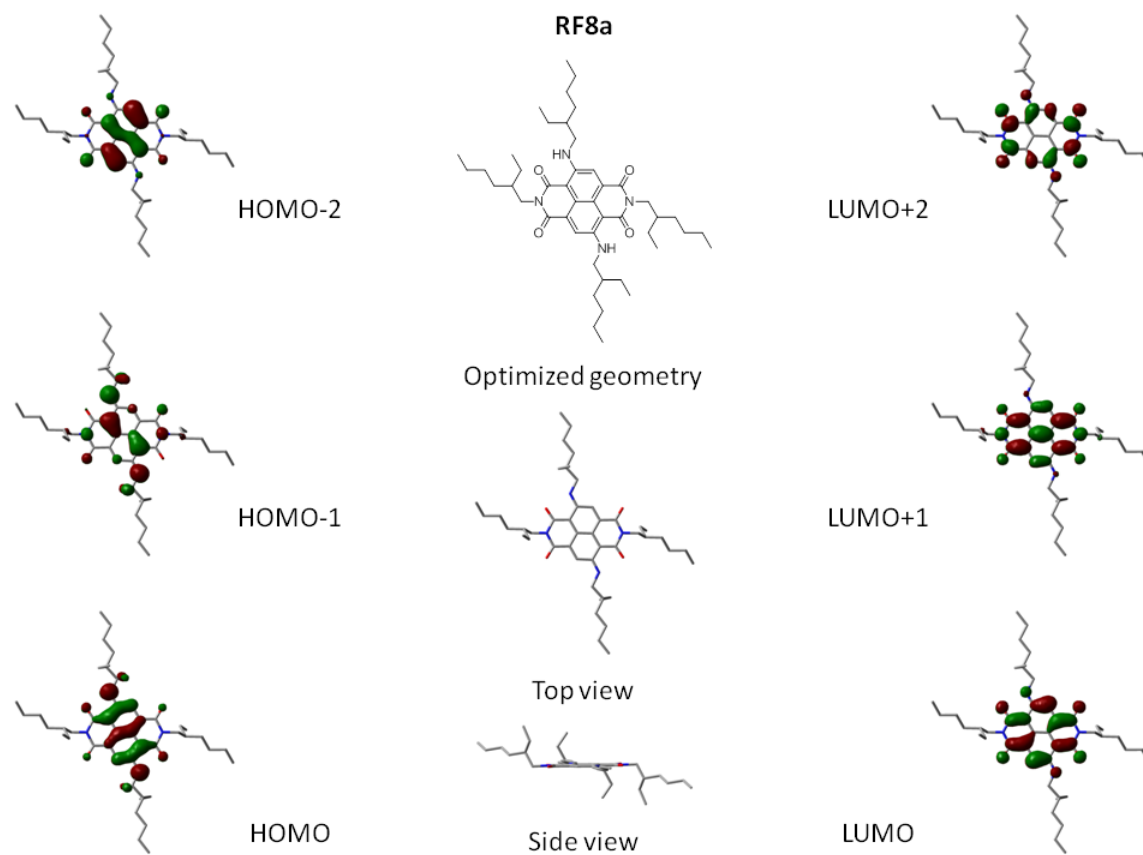

**Figure S24:** Optimized geometry and Kohn-Sham frontier molecular orbitals of local minima of **RF8a** at the B3LYP/6-31G(d,p) level of theory.

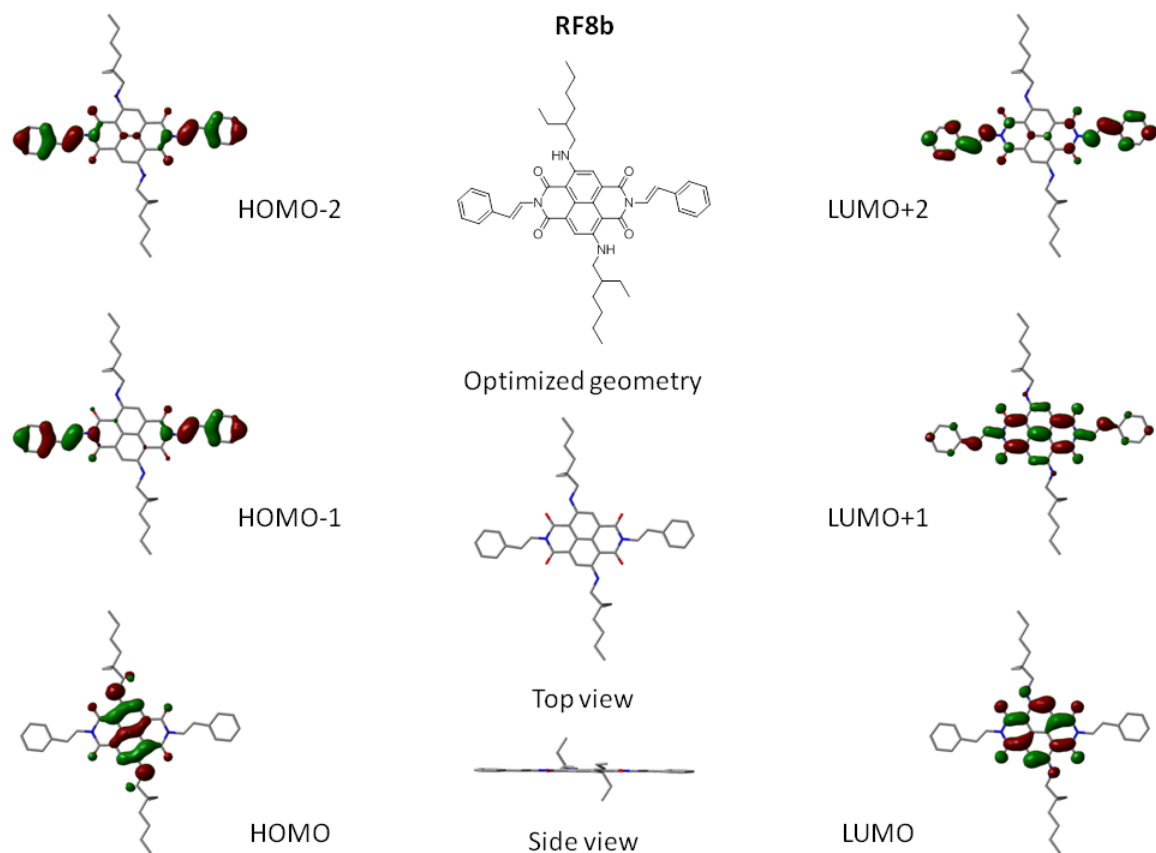

**Figure S25:** Optimized geometry and Kohn-Sham frontier molecular orbitals of local minima of **RF8b** at the B3LYP/6-31G(d,p) level of theory.

**Table S2:** Eigen values of frontier molecular orbitals (in eV) of molecules in gas phase and in chloroform polarizable continuum model (values in parenthesis), calculated for optimized geometries at B3LYP/6-31G(d,p) level of theory.

|               | <b>RF7H</b>      | <b>RF7a</b>      | <b>RF7b</b>      | <b>RF8H</b>      | <b>RF8a</b>      | <b>RF6</b>       | <b>RF8b</b>      |
|---------------|------------------|------------------|------------------|------------------|------------------|------------------|------------------|
| <b>LUMO+2</b> | -1.44<br>(-1.44) | -1.31<br>(-1.36) | -1.47<br>(-1.47) | -0.46<br>(-0.54) | -0.35<br>(-0.49) | -1.06<br>(-1.20) | -0.90<br>(-1.03) |
| <b>LUMO+1</b> | -1.66<br>(-1.69) | -1.52<br>(-1.61) | -1.96<br>(-2.04) | -1.25<br>(-1.31) | -1.14<br>(-1.25) | -1.20<br>(-1.36) | -1.71<br>(-1.82) |
| <b>LUMO</b>   | -3.32<br>(-3.35) | -3.18<br>(-3.27) | -3.35<br>(-3.40) | -2.86<br>(-2.91) | -2.72<br>(-2.83) | -2.75<br>(-2.88) | -2.91<br>(-2.97) |
| <b>HOMO</b>   | -5.82<br>(-5.85) | -5.74<br>(-5.82) | -5.69<br>(-5.82) | -5.31<br>(-5.31) | -5.17<br>(-5.22) | -5.20<br>(-5.28) | -5.33<br>(-5.36) |
| <b>HOMO-1</b> | -6.18<br>(-6.18) | -6.04<br>(-6.10) | -5.74<br>(-5.85) | -6.72<br>(-6.72) | -6.56<br>(-6.61) | -5.77<br>(-5.88) | -5.58<br>(-5.74) |
| <b>HOMO-2</b> | -6.78<br>(-6.83) | -6.67<br>(-6.78) | -5.85<br>(-5.90) | -6.86<br>(-6.91) | -6.69<br>(-6.80) | -5.77<br>(-5.88) | -5.69<br>(-5.85) |

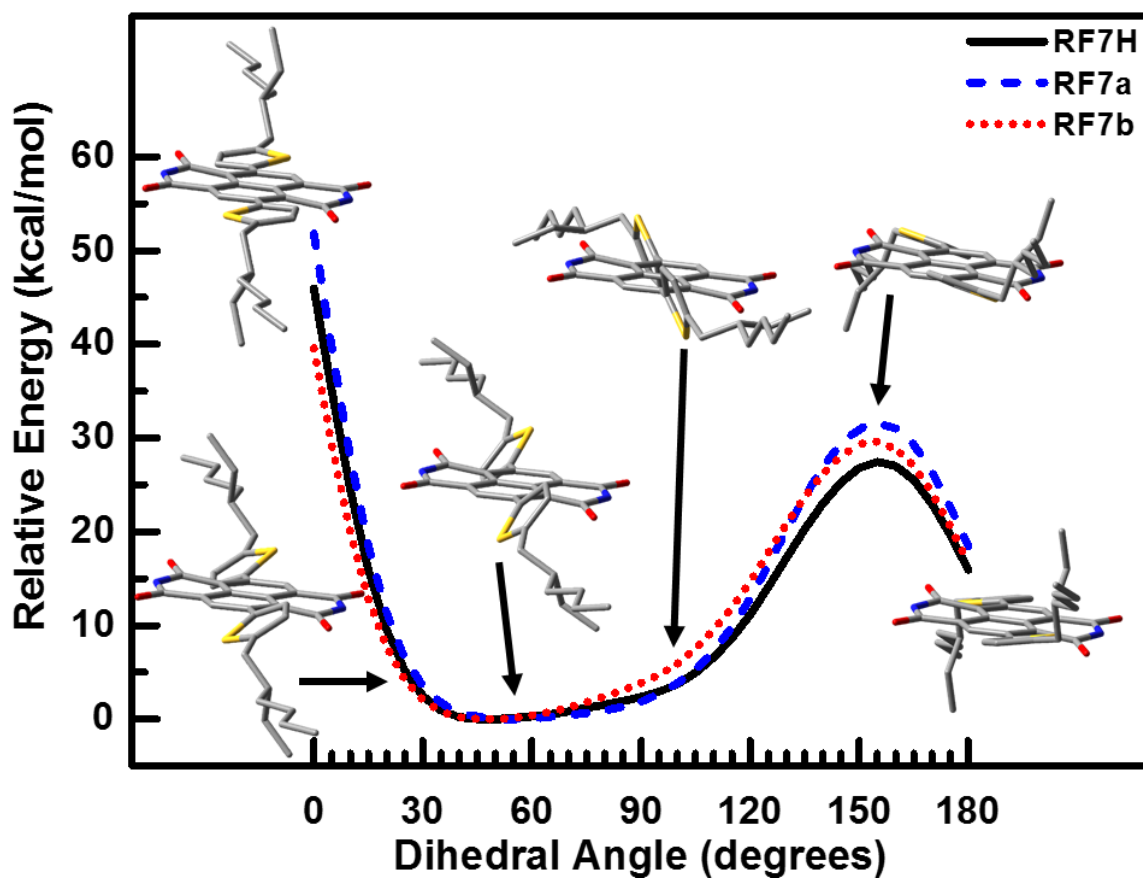

**Figure S26:** Potential energy scan over dihedral angle between core substituted thiophene units and NDI core of **RF7H**, **RF7a** and **RF7b** at the B3LYP/6-31G(d,p) level of theory.

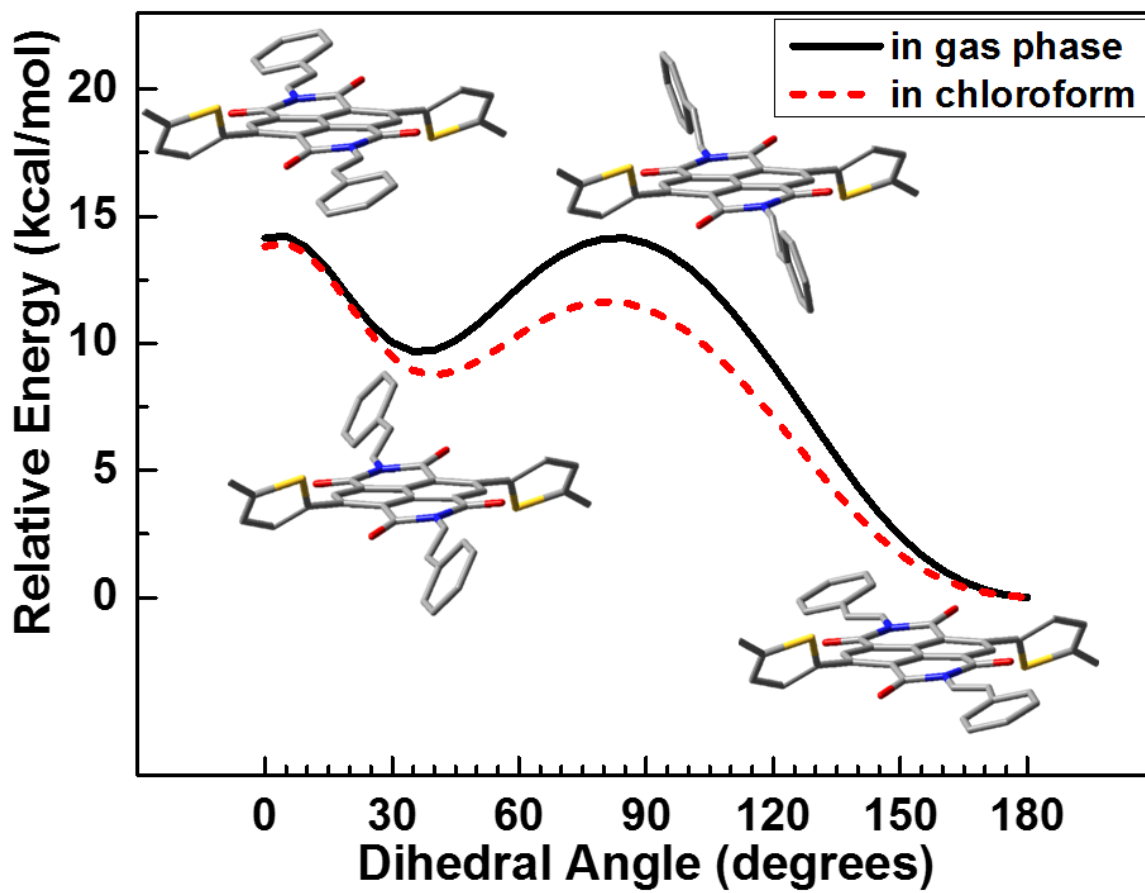

**Figure S27:** Potential energy scan over dihedral angle between styryl imide substitution and NDI core of **RF7b** at the B3LYP/6-31G(d,p) level of theory.

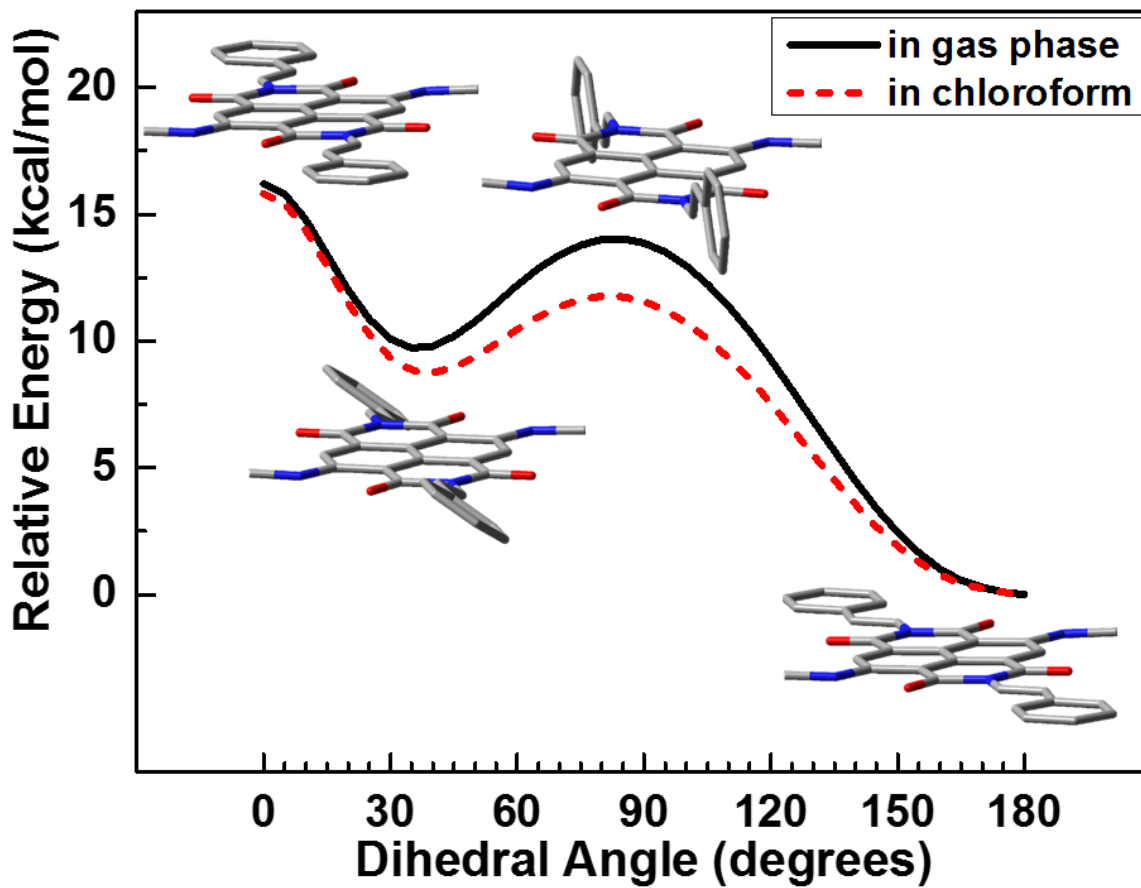

**Figure S28:** Potential energy scan over dihedral angle between styryl imide substitution and NDI core of **RF8b** at the B3LYP/6-31G(d,p) level of theory.

*Note:* The potential energy scans were done by scanning the respective dihedral angles of the optimized geometries in the gas phase or PCM model (chloroform).

## Cartesian coordinates, frequencies and energies of optimized geometries in gas phase

Note: All molecules are neutral and were optimized using B3LYP/6-31G(d,p) level of theory at normal optimization criteria in Gaussian 09 software package.<sup>S2</sup>

### RF7H

#### Cartesian coordinates

|   |           |           |           |
|---|-----------|-----------|-----------|
| C | 0.198827  | 0.180566  | -0.660617 |
| C | -0.198827 | -0.180566 | 0.660617  |
| C | 1.529120  | -0.059785 | -1.126102 |
| C | -1.529120 | 0.059785  | 1.126102  |
| C | -0.780381 | 0.796938  | -1.487470 |
| C | 0.780381  | -0.796938 | 1.487470  |
| C | 2.490883  | -0.617667 | -0.264829 |
| C | -2.490883 | 0.617667  | 0.264829  |
| C | -2.065013 | 0.997020  | -1.034919 |
| C | 2.065013  | -0.997020 | 1.034919  |
| C | 1.824730  | 0.201933  | -2.565747 |
| C | -1.824730 | -0.201933 | 2.565747  |
| C | -0.455904 | 1.200765  | -2.878841 |
| C | 0.455904  | -1.200765 | 2.878841  |
| N | 0.826256  | 0.865373  | -3.283936 |
| N | -0.826256 | -0.865373 | 3.283936  |
| O | 2.843131  | -0.134700 | -3.145258 |
| O | -2.843131 | 0.134700  | 3.145258  |
| O | -1.234304 | 1.763507  | -3.632239 |
| O | 1.234304  | -1.763507 | 3.632239  |
| H | -2.781036 | 1.430951  | -1.723168 |
| H | 2.781036  | -1.430951 | 1.723168  |
| C | 3.923189  | -0.818501 | -0.541587 |
| C | -3.923189 | 0.818501  | 0.541587  |
| C | 4.651732  | -1.944042 | -0.218092 |
| C | -4.651732 | 1.944042  | 0.218092  |
| S | 4.996784  | 0.437205  | -1.114719 |
| S | -4.996784 | -0.437205 | 1.114719  |
| C | 6.044573  | -1.811919 | -0.457808 |
| C | -6.044573 | 1.811919  | 0.457808  |
| C | 6.403354  | -0.570977 | -0.927862 |
| C | -6.403354 | 0.570977  | 0.927862  |
| H | 4.189307  | -2.850033 | 0.158078  |
| H | -4.189307 | 2.850033  | -0.158078 |
| H | 6.760872  | -2.608817 | -0.290339 |
| H | -6.760872 | 2.608817  | 0.290339  |
| C | 7.780859  | -0.066925 | -1.266096 |
| H | 8.252445  | -0.795082 | -1.937901 |
| H | 7.708074  | 0.867257  | -1.836806 |
| C | 8.722450  | 0.156095  | -0.050368 |
| H | 8.772205  | -0.798254 | 0.494643  |
| C | 10.150395 | 0.504662  | -0.548531 |
| H | 10.240048 | 0.248943  | -1.613064 |
| H | 10.300464 | 1.591980  | -0.495315 |
| C | 11.284809 | -0.207330 | 0.203318  |
| H | 11.156296 | -1.294013 | 0.095276  |
| H | 11.211338 | -0.002397 | 1.278696  |
| C | 12.681872 | 0.187058  | -0.291054 |
| H | 12.753541 | -0.009316 | -1.369660 |
| H | 12.813863 | 1.271229  | -0.172387 |
| C | 13.810940 | -0.547342 | 0.438096  |

|   |            |           |           |
|---|------------|-----------|-----------|
| H | 13.730183  | -1.632026 | 0.303764  |
| H | 14.793988  | -0.239491 | 0.067435  |
| H | 13.783951  | -0.346307 | 1.515096  |
| C | 8.141567   | 1.215398  | 0.906975  |
| H | 8.046475   | 2.164507  | 0.359443  |
| H | 7.122233   | 0.919486  | 1.179814  |
| C | 8.943414   | 1.452226  | 2.190981  |
| H | 9.062957   | 0.525365  | 2.763492  |
| H | 9.942726   | 1.849365  | 1.986387  |
| H | 8.432116   | 2.173921  | 2.836321  |
| C | -7.780859  | 0.066925  | 1.266096  |
| H | -8.252445  | 0.795082  | 1.937901  |
| H | -7.708074  | -0.867257 | 1.836806  |
| C | -8.722450  | -0.156095 | 0.050368  |
| H | -8.772205  | 0.798254  | -0.494643 |
| C | -10.150395 | -0.504662 | 0.548531  |
| H | -10.240048 | -0.248943 | 1.613064  |
| H | -10.300464 | -1.591980 | 0.495315  |
| C | -11.284809 | 0.207330  | -0.203318 |
| H | -11.156296 | 1.294013  | -0.095276 |
| H | -11.211338 | 0.002397  | -1.278696 |
| C | -12.681872 | -0.187058 | 0.291054  |
| H | -12.753541 | 0.009316  | 1.369660  |
| H | -12.813863 | -1.271229 | 0.172387  |
| C | -13.810940 | 0.547342  | -0.438096 |
| H | -13.783951 | 0.346307  | -1.515096 |
| H | -14.793988 | 0.239491  | -0.067435 |
| H | -13.730183 | 1.632026  | -0.303764 |
| C | -8.141567  | -1.215398 | -0.906975 |
| H | -7.122233  | -0.919486 | -1.179814 |
| H | -8.046475  | -2.164507 | -0.359443 |
| C | -8.943414  | -1.452226 | -2.190981 |
| H | -9.942726  | -1.849365 | -1.986387 |
| H | -9.062957  | -0.525365 | -2.763492 |
| H | -8.432116  | -2.173921 | -2.836321 |
| H | -1.053511  | -1.055654 | 4.253940  |
| H | 1.053511   | 1.055654  | -4.253940 |

## Frequencies

|          |          |          |
|----------|----------|----------|
| 9.0658   | 12.1864  | 13.1320  |
| 13.8827  | 18.7688  | 23.2225  |
| 27.2303  | 35.2347  | 41.0823  |
| 46.3824  | 47.2425  | 51.5981  |
| 53.5619  | 71.4209  | 73.5960  |
| 79.8807  | 81.5212  | 90.5410  |
| 103.3961 | 116.8198 | 117.3225 |
| 128.3715 | 132.3126 | 133.2191 |
| 134.5289 | 139.4233 | 145.2478 |
| 160.7567 | 160.9432 | 168.2630 |
| 183.7272 | 207.5333 | 221.4537 |
| 223.5823 | 230.9533 | 241.6273 |
| 247.8022 | 253.8650 | 259.9828 |
| 262.2184 | 273.9884 | 276.9567 |
| 280.0852 | 290.2990 | 312.7572 |
| 315.1129 | 316.2903 | 327.0092 |
| 343.2715 | 357.6421 | 366.8036 |
| 367.5029 | 386.0764 | 386.4315 |
| 403.8330 | 428.7414 | 433.3285 |
| 457.4388 | 458.5594 | 465.5122 |
| 474.9596 | 482.9760 | 494.9783 |
| 509.2000 | 522.9052 | 544.3714 |
| 557.3968 | 567.8952 | 573.5907 |
| 584.7457 | 592.1249 | 617.1385 |
| 632.6109 | 643.0776 | 655.6089 |
| 666.9084 | 674.4007 | 679.8737 |



|           |           |           |
|-----------|-----------|-----------|
| 689.2232  | 726.2216  | 726.3603  |
| 726.7507  | 734.7892  | 734.8583  |
| 743.1031  | 748.4367  | 748.6043  |
| 765.7312  | 767.2877  | 774.7518  |
| 781.0236  | 782.0736  | 782.2084  |
| 785.5244  | 785.7011  | 786.9209  |
| 789.7112  | 795.3548  | 816.8377  |
| 817.1860  | 825.6980  | 826.4351  |
| 887.2030  | 901.5216  | 902.1756  |
| 902.3911  | 904.6343  | 924.4504  |
| 924.4518  | 936.0231  | 945.3164  |
| 945.7741  | 967.9839  | 970.2271  |
| 982.8153  | 982.9299  | 1003.9883 |
| 1004.1052 | 1037.4553 | 1037.5079 |
| 1040.9847 | 1049.0068 | 1055.1690 |
| 1063.7137 | 1065.4312 | 1067.0829 |
| 1067.6748 | 1074.5878 | 1078.7047 |
| 1091.4360 | 1102.9461 | 1115.6168 |
| 1115.8838 | 1142.3784 | 1142.3926 |
| 1148.4896 | 1162.0479 | 1162.0639 |
| 1189.5343 | 1189.5804 | 1204.5770 |
| 1228.0255 | 1231.0971 | 1247.9072 |
| 1250.0922 | 1250.7707 | 1254.1557 |
| 1258.7852 | 1271.0466 | 1271.8231 |
| 1273.3256 | 1283.4685 | 1285.1315 |
| 1310.8471 | 1311.3027 | 1315.8773 |
| 1315.8798 | 1327.7306 | 1329.8358 |
| 1331.5202 | 1331.5576 | 1340.5750 |
| 1340.5863 | 1352.1217 | 1352.3289 |
| 1364.2868 | 1364.7830 | 1377.3245 |
| 1377.4739 | 1391.5069 | 1391.5108 |
| 1394.7637 | 1401.5842 | 1401.9238 |
| 1411.3237 | 1414.6809 | 1414.6841 |
| 1415.9522 | 1424.6785 | 1427.7515 |
| 1427.7581 | 1429.0311 | 1429.2744 |
| 1429.3132 | 1450.3339 | 1470.2439 |
| 1491.4765 | 1491.7115 | 1499.1301 |
| 1499.1740 | 1500.4799 | 1500.5712 |
| 1503.9282 | 1503.9952 | 1504.3308 |
| 1510.3718 | 1511.7359 | 1514.7200 |
| 1514.7202 | 1515.0802 | 1515.0807 |
| 1518.4203 | 1518.4209 | 1524.0652 |
| 1524.0665 | 1528.4254 | 1528.4254 |
| 1587.4509 | 1587.9518 | 1598.8435 |
| 1621.6712 | 1653.4446 | 1782.5559 |
| 1785.0652 | 1791.6048 | 1794.1801 |
| 3006.9495 | 3006.9499 | 3015.4406 |
| 3015.4448 | 3017.0431 | 3017.0433 |
| 3020.6451 | 3020.6506 | 3025.7328 |
| 3025.7363 | 3034.5552 | 3034.5798 |
| 3038.0457 | 3038.0495 | 3040.8115 |
| 3040.8306 | 3047.8824 | 3047.8826 |
| 3050.3953 | 3050.3958 | 3073.2009 |
| 3073.2112 | 3076.3704 | 3076.3767 |
| 3078.5531 | 3078.5598 | 3106.4199 |
| 3106.4244 | 3108.2649 | 3108.2684 |
| 3111.7167 | 3111.7211 | 3115.6692 |
| 3115.6810 | 3209.3364 | 3209.3625 |
| 3223.9546 | 3223.9629 | 3229.4078 |
| 3229.6284 | 3596.9731 | 3597.1597 |

## Energies

SCF Done: E(RB3LYP) = -2680.28543762 A.U. after 1 cycles  
 Zero-point correction= 0.727849 (Hartree/Particle)  
 Thermal correction to Energy= 0.773264

|                                              |              |
|----------------------------------------------|--------------|
| Thermal correction to Enthalpy=              | 0.774208     |
| Thermal correction to Gibbs Free Energy=     | 0.641208     |
| Sum of electronic and zero-point Energies=   | -2679.557589 |
| Sum of electronic and thermal Energies=      | -2679.512173 |
| Sum of electronic and thermal Enthalpies=    | -2679.511229 |
| Sum of electronic and thermal Free Energies= | -2679.644230 |

## RF7a

### Cartesian coordinates

|   |            |           |           |
|---|------------|-----------|-----------|
| C | -0.304632  | -0.611378 | 0.200390  |
| C | 0.304583   | 0.611295  | -0.200258 |
| C | -1.691185  | -0.856253 | -0.010787 |
| C | 1.691136   | 0.856171  | 0.010921  |
| C | 0.517361   | -1.575720 | 0.833603  |
| C | -0.517409  | 1.575633  | -0.833478 |
| C | -2.498416  | 0.141904  | -0.587141 |
| C | 2.498364   | -0.141977 | 0.587295  |
| C | 1.863869   | -1.340023 | 1.009509  |
| C | -1.863920  | 1.339944  | -1.009367 |
| C | -2.219859  | -2.219924 | 0.289842  |
| C | 2.219821   | 2.219827  | -0.289758 |
| C | -0.036888  | -2.875450 | 1.289223  |
| C | 0.036851   | 2.875340  | -1.289151 |
| N | -1.368409  | -3.126239 | 0.948644  |
| N | 1.368386   | 3.126116  | -0.948618 |
| O | -3.343743  | -2.581605 | -0.024868 |
| O | 3.343725   | 2.581497  | 0.024896  |
| O | 0.635108   | -3.691781 | 1.904932  |
| O | -0.635144  | 3.691656  | -1.904880 |
| H | 2.460296   | -2.123172 | 1.462143  |
| H | -2.460346  | 2.123093  | -1.462001 |
| C | -3.960433  | 0.109494  | -0.771651 |
| C | 3.960377   | -0.109553 | 0.771841  |
| C | -4.634712  | 0.482932  | -1.913872 |
| C | 4.634630   | -0.482994 | 1.914077  |
| S | -5.100822  | -0.179613 | 0.522392  |
| S | 5.100799   | 0.179585  | -0.522168 |
| C | -6.047073  | 0.504412  | -1.763087 |
| C | 6.046995   | -0.504455 | 1.763329  |
| C | -6.466725  | 0.188638  | -0.493351 |
| C | 6.466679   | -0.188658 | 0.493610  |
| H | -4.124629  | 0.712353  | -2.843045 |
| H | 4.124525   | -0.712430 | 2.843233  |
| H | -6.732666  | 0.746896  | -2.567803 |
| H | 6.732569   | -0.746936 | 2.568062  |
| C | -7.874564  | 0.147524  | 0.038598  |
| H | -8.473887  | -0.482681 | -0.630571 |
| H | -7.891911  | -0.348819 | 1.016866  |
| C | -8.573125  | 1.529928  | 0.162410  |
| H | -8.543562  | 1.992863  | -0.835130 |
| C | -10.060145 | 1.334830  | 0.561509  |
| H | -10.352122 | 0.290286  | 0.386618  |
| H | -10.171710 | 1.493091  | 1.643304  |
| C | -11.052302 | 2.232315  | -0.193307 |
| H | -10.963700 | 2.032963  | -1.271007 |
| H | -10.783484 | 3.287784  | -0.060777 |
| C | -12.508816 | 2.024675  | 0.239322  |
| H | -12.778072 | 0.967481  | 0.109269  |
| H | -12.599016 | 2.228700  | 1.315039  |
| C | -13.499431 | 2.902710  | -0.531145 |
| H | -13.458880 | 2.696394  | -1.606728 |
| H | -14.528583 | 2.731896  | -0.199105 |
| H | -13.277609 | 3.966886  | -0.391696 |

|   |           |            |           |
|---|-----------|------------|-----------|
| C | -7.802332 | 2.448172   | 1.131336  |
| H | -7.787666 | 1.973765   | 2.123473  |
| H | -6.757387 | 2.501353   | 0.805570  |
| C | -8.347458 | 3.874053   | 1.262490  |
| H | -8.384266 | 4.377964   | 0.289970  |
| H | -9.356224 | 3.893075   | 1.686885  |
| H | -7.706915 | 4.472026   | 1.918977  |
| C | 7.874531  | -0.147508  | -0.038299 |
| H | 8.473822  | 0.482701   | 0.630895  |
| H | 7.891895  | 0.348850   | -1.016560 |
| C | 8.573126  | -1.529895  | -0.162111 |
| H | 8.543543  | -1.992848  | 0.835419  |
| C | 10.060154 | -1.334753  | -0.561159 |
| H | 10.352103 | -0.290208  | -0.386231 |
| H | 10.171755 | -1.492983  | -1.642956 |
| C | 11.052309 | -2.232236  | 0.193663  |
| H | 10.963670 | -2.032914  | 1.271365  |
| H | 10.783519 | -3.287708  | 0.061097  |
| C | 12.508830 | -2.024552  | -0.238917 |
| H | 12.778058 | -0.967355  | -0.108829 |
| H | 12.599067 | -2.228547  | -1.314637 |
| C | 13.499443 | -2.902583  | 0.531556  |
| H | 13.277649 | -3.966761  | 0.392075  |
| H | 14.528601 | -2.731738  | 0.199550  |
| H | 13.458856 | -2.696295  | 1.607143  |
| C | 7.802385  | -2.448139  | -1.131079 |
| H | 6.757432  | -2.501351  | -0.805346 |
| H | 7.787739  | -1.973714  | -2.123208 |
| C | 8.347548  | -3.874006  | -1.262242 |
| H | 9.356327  | -3.892996  | -1.686607 |
| H | 8.384339  | -4.377933  | -0.289730 |
| H | 7.707038  | -4.471981  | -1.918760 |
| C | -1.945005 | -4.438830  | 1.309413  |
| H | -2.951478 | -4.246474  | 1.685298  |
| H | -1.325555 | -4.829919  | 2.117326  |
| C | 1.945021  | 4.438647   | -1.309539 |
| H | 2.951477  | 4.246214   | -1.685434 |
| H | 1.325561  | 4.829667   | -2.117478 |
| C | -2.025581 | -5.456437  | 0.150205  |
| H | -2.674602 | -5.014827  | -0.616150 |
| C | 2.025670  | 5.456404   | -0.150468 |
| H | 2.674770  | 5.014921   | 0.615892  |
| C | -2.709530 | -6.745203  | 0.682304  |
| H | -3.192209 | -6.535268  | 1.647071  |
| H | -1.944217 | -7.503388  | 0.898167  |
| C | -3.773168 | -7.336297  | -0.254645 |
| H | -4.552733 | -6.581379  | -0.428201 |
| H | -3.332938 | -7.544954  | -1.237960 |
| C | -4.419649 | -8.615506  | 0.290605  |
| H | -4.860195 | -8.407202  | 1.275353  |
| H | -3.640365 | -9.370689  | 0.462499  |
| C | -5.493364 | -9.191963  | -0.637153 |
| H | -5.936044 | -10.102941 | -0.221270 |
| H | -6.303985 | -8.472577  | -0.799658 |
| H | -5.075466 | -9.443704  | -1.618541 |
| C | -0.642775 | -5.721316  | -0.477049 |
| H | -0.206660 | -4.764599  | -0.788912 |
| H | 0.028907  | -6.120866  | 0.293744  |
| C | -0.653626 | -6.660325  | -1.688128 |
| H | -0.986534 | -7.668906  | -1.423359 |
| H | -1.316748 | -6.287051  | -2.476874 |
| H | 0.350522  | -6.750858  | -2.115205 |
| C | 2.709525  | 6.745110   | -0.682833 |
| H | 3.192145  | 6.535025   | -1.647597 |
| H | 1.944158  | 7.503217   | -0.898781 |
| C | 3.773206  | 7.336437   | 0.253922  |

|   |           |           |           |
|---|-----------|-----------|-----------|
| H | 4.552821  | 6.581592  | 0.427567  |
| H | 3.333042  | 7.545269  | 1.237230  |
| C | 4.419575  | 8.615567  | -0.291640 |
| H | 4.860043  | 8.407088  | -1.276386 |
| H | 3.640238  | 9.370677  | -0.463617 |
| C | 5.493344  | 9.192267  | 0.635904  |
| H | 6.304016  | 8.472955  | 0.798481  |
| H | 5.935941  | 10.103184 | 0.219799  |
| H | 5.075522  | 9.444184  | 1.617280  |
| C | 0.642912  | 5.721333  | 0.476870  |
| H | -0.028849 | 6.120757  | -0.293918 |
| H | 0.206855  | 4.764645  | 0.788905  |
| C | 0.653852  | 6.660510  | 1.687819  |
| H | 1.317059  | 6.287361  | 2.476553  |
| H | 0.986711  | 7.669062  | 1.422881  |
| H | -0.350257 | 6.751077  | 2.114980  |

### Frequencies

|          |          |          |
|----------|----------|----------|
| 3.9186   | 8.0668   | 11.9098  |
| 11.9284  | 14.9205  | 15.7848  |
| 17.5928  | 18.3374  | 20.9613  |
| 24.3653  | 24.9951  | 30.4642  |
| 34.4447  | 36.0366  | 36.1081  |
| 43.5636  | 47.6742  | 52.6428  |
| 53.2543  | 57.1577  | 58.0134  |
| 67.8629  | 68.1380  | 77.7040  |
| 80.3028  | 81.5964  | 82.7530  |
| 87.1684  | 101.5328 | 104.0529 |
| 111.4094 | 114.8766 | 115.4938 |
| 120.9799 | 121.5542 | 126.7693 |
| 127.5434 | 127.5551 | 130.0758 |
| 136.1910 | 138.2160 | 138.2343 |
| 147.0343 | 155.1108 | 162.9596 |
| 163.3316 | 179.7462 | 188.0282 |
| 197.1811 | 205.4047 | 210.3738 |
| 219.0526 | 228.7039 | 229.0976 |
| 236.0993 | 240.0915 | 240.4921 |
| 249.4248 | 250.9164 | 253.3985 |
| 256.1797 | 257.8323 | 260.7886 |
| 268.9040 | 271.5134 | 271.7000 |
| 275.5373 | 289.8159 | 307.1608 |
| 308.4626 | 313.1017 | 317.7106 |
| 325.0057 | 331.7829 | 345.1109 |
| 354.2872 | 356.1598 | 366.1950 |
| 367.8740 | 369.2128 | 374.2568 |
| 380.1318 | 386.2746 | 386.5690 |
| 406.7974 | 412.1589 | 431.6484 |
| 442.5288 | 447.1923 | 458.3088 |
| 461.9146 | 467.7222 | 475.3980 |
| 475.4722 | 486.5074 | 496.6646 |
| 498.4956 | 512.0840 | 513.7457 |
| 530.6429 | 554.8940 | 562.7345 |
| 564.3022 | 573.0431 | 574.6233 |
| 585.6940 | 597.4879 | 617.9067 |
| 631.6043 | 642.4799 | 648.1382 |
| 655.5330 | 678.7125 | 714.8977 |
| 725.7344 | 725.9020 | 734.0257 |
| 734.0597 | 734.2793 | 734.3386 |
| 740.0995 | 740.1973 | 747.5562 |
| 756.0149 | 757.0331 | 758.7853 |
| 770.8524 | 774.4873 | 778.3630 |
| 781.5788 | 781.9461 | 782.1244 |
| 782.8963 | 784.1504 | 784.1849 |
| 784.1937 | 785.6942 | 812.3448 |
| 815.7640 | 816.1616 | 824.1329 |

|           |           |           |
|-----------|-----------|-----------|
| 824.8009  | 825.3272  | 864.1507  |
| 871.2979  | 898.8182  | 899.4282  |
| 902.6351  | 902.6482  | 904.4500  |
| 906.6030  | 923.9216  | 924.6989  |
| 924.8266  | 925.6711  | 941.6609  |
| 944.1799  | 945.4179  | 946.1367  |
| 964.8172  | 966.8909  | 969.0424  |
| 974.0709  | 983.2126  | 983.5765  |
| 988.4004  | 990.1562  | 1004.1814 |
| 1004.4790 | 1008.4980 | 1016.4215 |
| 1033.6596 | 1037.8778 | 1037.8936 |
| 1039.4108 | 1039.7462 | 1045.3121 |
| 1052.2996 | 1064.0671 | 1065.1688 |
| 1065.1852 | 1066.2687 | 1068.0842 |
| 1068.4468 | 1068.6349 | 1069.1641 |
| 1076.8139 | 1079.3511 | 1085.1640 |
| 1087.9946 | 1099.0203 | 1112.1574 |
| 1116.0136 | 1117.3538 | 1121.5848 |
| 1142.5937 | 1142.9283 | 1142.9305 |
| 1148.1039 | 1148.8944 | 1162.1587 |
| 1162.2086 | 1169.9521 | 1180.4935 |
| 1189.7255 | 1189.7695 | 1194.2238 |
| 1197.1009 | 1216.6932 | 1223.5217 |
| 1228.4480 | 1232.7222 | 1237.8153 |
| 1247.8537 | 1250.9286 | 1252.5310 |
| 1252.7148 | 1254.1881 | 1265.6849 |
| 1275.2168 | 1275.3110 | 1278.8129 |
| 1279.2409 | 1281.9042 | 1290.6592 |
| 1309.6008 | 1309.9437 | 1310.8400 |
| 1311.0450 | 1318.2760 | 1318.2776 |
| 1327.2012 | 1327.2958 | 1331.5018 |
| 1331.5103 | 1332.8548 | 1334.4014 |
| 1335.3547 | 1335.7055 | 1339.4538 |
| 1339.5404 | 1342.7842 | 1342.7939 |
| 1352.9937 | 1353.2581 | 1355.2530 |
| 1356.1079 | 1364.7849 | 1365.5857 |
| 1372.7739 | 1376.8779 | 1381.5026 |
| 1384.7039 | 1392.4009 | 1392.4657 |
| 1393.6345 | 1396.8119 | 1397.6202 |
| 1403.1196 | 1403.4386 | 1411.0361 |
| 1412.1935 | 1413.5500 | 1415.7265 |
| 1415.7576 | 1417.4186 | 1418.2984 |
| 1421.9930 | 1425.5486 | 1427.2335 |
| 1427.2344 | 1427.3983 | 1427.4732 |
| 1429.0334 | 1429.0336 | 1430.4376 |
| 1430.4544 | 1437.7455 | 1455.1326 |
| 1471.6846 | 1481.4665 | 1481.5711 |
| 1492.0639 | 1492.1965 | 1497.1206 |
| 1497.1704 | 1500.1215 | 1500.1479 |
| 1500.4887 | 1500.4902 | 1500.7628 |
| 1500.7928 | 1504.1548 | 1504.1577 |
| 1504.3516 | 1504.3549 | 1508.5137 |
| 1513.8819 | 1513.8822 | 1514.8080 |
| 1514.8269 | 1514.9216 | 1515.1096 |
| 1515.1115 | 1515.2377 | 1515.2421 |
| 1517.1584 | 1518.2673 | 1518.2690 |
| 1518.5783 | 1518.5826 | 1523.1529 |
| 1523.1562 | 1523.4070 | 1523.4088 |
| 1527.8871 | 1527.8877 | 1528.4714 |
| 1528.4730 | 1589.1126 | 1591.4865 |
| 1605.7419 | 1617.5202 | 1653.3510 |
| 1736.1240 | 1739.3222 | 1773.6000 |
| 1775.8516 | 3007.0869 | 3007.0873 |
| 3014.2173 | 3014.2230 | 3014.5442 |
| 3014.5479 | 3017.5764 | 3017.5766 |
| 3018.9270 | 3018.9293 | 3021.2648 |

|           |           |           |
|-----------|-----------|-----------|
| 3021.2708 | 3025.7897 | 3025.7926 |
| 3027.8743 | 3027.8780 | 3033.9807 |
| 3034.0004 | 3035.5440 | 3035.5676 |
| 3037.6862 | 3037.6895 | 3037.9003 |
| 3037.9042 | 3040.2568 | 3040.2650 |
| 3040.3845 | 3040.4221 | 3044.2235 |
| 3044.2254 | 3046.8672 | 3046.8681 |
| 3048.1940 | 3048.1988 | 3050.1453 |
| 3050.1460 | 3052.6944 | 3052.6974 |
| 3073.0614 | 3073.0691 | 3074.2628 |
| 3074.2655 | 3076.0825 | 3076.0872 |
| 3076.9175 | 3076.9231 | 3077.5648 |
| 3077.5702 | 3097.9841 | 3098.0050 |
| 3105.6514 | 3105.6569 | 3106.1553 |
| 3106.1645 | 3107.9095 | 3107.9144 |
| 3108.2395 | 3108.2461 | 3110.6631 |
| 3110.6709 | 3111.2696 | 3111.2738 |
| 3115.7433 | 3115.7453 | 3115.8314 |
| 3115.8556 | 3158.9292 | 3158.9326 |
| 3208.3279 | 3208.3562 | 3223.2726 |
| 3223.2778 | 3232.9443 | 3233.1699 |

## Energies

```

SCF Done: E(RB3LYP) = -3309.33274675 A.U. after 1 cycles
Zero-point correction= 1.182526 (Hartree/Particle)
Thermal correction to Energy= 1.250098
Thermal correction to Enthalpy= 1.251042
Thermal correction to Gibbs Free Energy= 1.064802
Sum of electronic and zero-point Energies= -3308.150220
Sum of electronic and thermal Energies= -3308.082648
Sum of electronic and thermal Enthalpies= -3308.081704
Sum of electronic and thermal Free Energies= -3308.267945

```

## RF7b

### Cartesian coordinates

|   |           |           |           |
|---|-----------|-----------|-----------|
| C | 0.293849  | 0.019488  | -0.646780 |
| C | -0.293849 | -0.019488 | 0.646780  |
| C | 1.650027  | -0.345080 | -0.858148 |
| C | -1.650027 | 0.345080  | 0.858148  |
| C | -0.514037 | 0.450633  | -1.724750 |
| C | 0.514037  | -0.450633 | 1.724750  |
| C | 2.459178  | -0.695856 | 0.240663  |
| C | -2.459178 | 0.695856  | -0.240663 |
| C | -1.841225 | 0.763377  | -1.517201 |
| C | 1.841225  | -0.763377 | 1.517201  |
| C | 2.133885  | -0.475042 | -2.258324 |
| C | -2.133885 | 0.475042  | 2.258324  |
| C | 0.026319  | 0.567254  | -3.102264 |
| C | -0.026319 | -0.567254 | 3.102264  |
| N | 1.330421  | 0.083791  | -3.308742 |
| N | -1.330421 | -0.083791 | 3.308742  |
| O | 3.171593  | -1.047621 | -2.539854 |
| O | -3.171593 | 1.047621  | 2.539854  |
| O | -0.643037 | 1.043390  | -4.007184 |
| O | 0.643037  | -1.043390 | 4.007184  |
| H | -2.436228 | 1.045528  | -2.377382 |
| H | 2.436228  | -1.045528 | 2.377382  |
| C | 3.907053  | -0.956797 | 0.225679  |
| C | -3.907053 | 0.956797  | -0.225679 |
| C | 4.554120  | -1.968751 | 0.902533  |
| C | -4.554120 | 1.968751  | -0.902533 |
| S | 5.081922  | 0.123222  | -0.490739 |

|   |           |           |            |
|---|-----------|-----------|------------|
| S | -5.081922 | -0.123222 | 0.490739   |
| C | 5.969765  | -1.897327 | 0.819750   |
| C | -5.969765 | 1.897327  | -0.819750  |
| C | 6.423351  | -0.809796 | 0.112257   |
| C | -6.423351 | 0.809796  | -0.112257  |
| H | 4.020890  | -2.758147 | 1.420782   |
| H | -4.020890 | 2.758147  | -1.420782  |
| H | 6.634582  | -2.627363 | 1.268424   |
| H | -6.634582 | 2.627363  | -1.268424  |
| C | 1.929274  | 0.038255  | -4.599598  |
| C | -1.929274 | -0.038255 | 4.599598   |
| H | 2.896651  | -0.437902 | -4.539242  |
| H | -2.896651 | 0.437902  | 4.539242   |
| C | 1.449837  | 0.501252  | -5.767448  |
| C | -1.449837 | -0.501252 | 5.767448   |
| H | 0.490989  | 0.997101  | -5.803660  |
| H | -0.490989 | -0.997101 | 5.803660   |
| C | 2.171158  | 0.395878  | -7.044340  |
| C | -2.171158 | -0.395878 | 7.044340   |
| C | 1.666615  | 1.105508  | -8.149392  |
| C | -1.666615 | -1.105508 | 8.149392   |
| C | 3.332728  | -0.377599 | -7.234910  |
| C | -3.332728 | 0.377599  | 7.234910   |
| C | 2.300743  | 1.061185  | -9.389468  |
| C | -2.300743 | -1.061185 | 9.389468   |
| C | 3.966388  | -0.421461 | -8.472661  |
| C | -3.966388 | 0.421461  | 8.472661   |
| C | 3.456534  | 0.298649  | -9.557043  |
| C | -3.456534 | -0.298649 | 9.557043   |
| H | 0.766506  | 1.701753  | -8.024724  |
| H | -0.766506 | -1.701753 | 8.024724   |
| H | 3.738357  | -0.962281 | -6.415131  |
| H | -3.738357 | 0.962281  | 6.415131   |
| H | 1.890406  | 1.621640  | -10.224618 |
| H | -1.890406 | -1.621640 | 10.224618  |
| H | 4.859958  | -1.026932 | -8.595398  |
| H | -4.859958 | 1.026932  | 8.595398   |
| H | 3.952683  | 0.258747  | -10.522199 |
| H | -3.952683 | -0.258747 | 10.522199  |
| C | 7.847179  | -0.399336 | -0.152424  |
| H | 8.378409  | -1.266105 | -0.565327  |
| H | 7.876571  | 0.372147  | -0.931850  |
| C | 8.631924  | 0.107734  | 1.089248   |
| H | 8.585211  | -0.690903 | 1.844267   |
| C | 10.120969 | 0.332637  | 0.713792   |
| H | 10.338558 | -0.169810 | -0.238610  |
| H | 10.293141 | 1.401664  | 0.526406   |
| C | 11.129964 | -0.175217 | 1.754540   |
| H | 10.977267 | -1.254202 | 1.901378   |
| H | 10.934125 | 0.290513  | 2.728517   |
| C | 12.589595 | 0.077647  | 1.357795   |
| H | 12.783501 | -0.383043 | 0.379427   |
| H | 12.744935 | 1.156356  | 1.219391   |
| C | 13.595598 | -0.455540 | 2.382216   |
| H | 13.489909 | -1.538235 | 2.515278   |
| H | 14.626633 | -0.258569 | 2.071227   |
| H | 13.449081 | 0.012254  | 3.362402   |
| C | 7.963553  | 1.361408  | 1.686854   |
| H | 7.966531  | 2.154493  | 0.924955   |
| H | 6.909646  | 1.135772  | 1.885366   |
| C | 8.599790  | 1.896198  | 2.974230   |
| H | 8.619458  | 1.129795  | 3.757395   |
| H | 9.627530  | 2.238241  | 2.816286   |
| H | 8.029196  | 2.747047  | 3.360408   |
| C | -7.847179 | 0.399336  | 0.152424   |
| H | -8.378409 | 1.266105  | 0.565327   |

|   |            |           |           |
|---|------------|-----------|-----------|
| H | -7.876571  | -0.372147 | 0.931850  |
| C | -8.631924  | -0.107734 | -1.089248 |
| H | -8.585211  | 0.690903  | -1.844267 |
| C | -10.120969 | -0.332637 | -0.713792 |
| H | -10.338558 | 0.169810  | 0.238610  |
| H | -10.293141 | -1.401664 | -0.526406 |
| C | -11.129964 | 0.175217  | -1.754540 |
| H | -10.977267 | 1.254202  | -1.901378 |
| H | -10.934125 | -0.290513 | -2.728517 |
| C | -12.589595 | -0.077647 | -1.357795 |
| H | -12.783501 | 0.383043  | -0.379427 |
| H | -12.744935 | -1.156356 | -1.219391 |
| C | -13.595598 | 0.455540  | -2.382216 |
| H | -13.449081 | -0.012254 | -3.362402 |
| H | -14.626633 | 0.258569  | -2.071227 |
| H | -13.489909 | 1.538235  | -2.515278 |
| C | -7.963553  | -1.361408 | -1.686854 |
| H | -6.909646  | -1.135772 | -1.885366 |
| H | -7.966531  | -2.154493 | -0.924955 |
| C | -8.599790  | -1.896198 | -2.974230 |
| H | -9.627530  | -2.238241 | -2.816286 |
| H | -8.619458  | -1.129795 | -3.757395 |
| H | -8.029196  | -2.747047 | -3.360408 |

## Frequencies

|          |          |          |
|----------|----------|----------|
| 7.2598   | 9.9485   | 10.7022  |
| 12.0085  | 12.3079  | 12.7184  |
| 18.0969  | 19.5175  | 19.7172  |
| 26.3042  | 28.3234  | 33.0347  |
| 33.4937  | 41.2984  | 41.6863  |
| 43.3743  | 50.4242  | 51.3573  |
| 55.9355  | 68.4473  | 69.4127  |
| 74.4477  | 76.4691  | 79.9326  |
| 86.7603  | 95.3183  | 101.0310 |
| 112.5163 | 112.7621 | 120.6840 |
| 124.6491 | 127.2010 | 129.6731 |
| 135.4969 | 139.2998 | 141.4656 |
| 143.6388 | 153.3416 | 155.8665 |
| 181.0293 | 186.0448 | 201.6209 |
| 201.8014 | 216.4904 | 219.0653 |
| 231.4237 | 232.3228 | 239.3216 |
| 243.6839 | 250.4944 | 256.4132 |
| 256.7608 | 262.3260 | 273.5417 |
| 273.9303 | 278.4591 | 280.5634 |
| 300.9586 | 320.7874 | 321.7053 |
| 335.8235 | 336.7498 | 350.8963 |
| 359.0939 | 366.6012 | 366.8769 |
| 374.6699 | 386.3147 | 386.6832 |
| 397.4050 | 413.9712 | 414.4735 |
| 426.3286 | 436.7755 | 445.3755 |
| 452.7766 | 462.0590 | 466.8838 |
| 474.9502 | 478.1327 | 488.0209 |
| 498.8768 | 500.3105 | 508.3368 |
| 514.1589 | 519.2262 | 527.9445 |
| 551.7200 | 555.5799 | 565.8302 |
| 574.7389 | 579.4093 | 584.1331 |
| 605.5174 | 611.6107 | 618.7916 |
| 633.0542 | 634.0304 | 634.0587 |
| 641.1360 | 663.2691 | 666.0893 |
| 675.0580 | 703.5362 | 705.4983 |
| 712.7366 | 726.0476 | 726.2221 |
| 734.0018 | 734.0051 | 738.8360 |
| 744.2784 | 747.4188 | 752.2786 |
| 758.2527 | 763.3022 | 766.5267 |
| 768.7768 | 773.6129 | 778.3066 |



|           |           |           |
|-----------|-----------|-----------|
| 780.9059  | 781.9738  | 782.6947  |
| 784.1231  | 784.1909  | 816.1727  |
| 816.4137  | 825.2755  | 825.7219  |
| 846.3354  | 850.8658  | 850.9865  |
| 864.2837  | 878.4834  | 878.4857  |
| 884.5772  | 898.1917  | 901.8279  |
| 902.1524  | 902.4021  | 902.7844  |
| 924.6016  | 924.6020  | 925.3501  |
| 925.7495  | 945.8358  | 945.9387  |
| 962.0623  | 962.7732  | 969.5568  |
| 969.5886  | 973.5627  | 975.3230  |
| 983.2580  | 983.5332  | 993.6567  |
| 993.7067  | 1004.2123 | 1004.3055 |
| 1013.5291 | 1013.5575 | 1020.5425 |
| 1020.5888 | 1037.5197 | 1037.5325 |
| 1044.7992 | 1048.2761 | 1057.4149 |
| 1057.4450 | 1062.6044 | 1065.1904 |
| 1068.0496 | 1068.5085 | 1069.5441 |
| 1078.5272 | 1083.9850 | 1097.4416 |
| 1110.0606 | 1111.3744 | 1114.4377 |
| 1114.6229 | 1130.8620 | 1131.6124 |
| 1142.8303 | 1142.8374 | 1162.7379 |
| 1162.7697 | 1169.4822 | 1187.7676 |
| 1187.7775 | 1189.8200 | 1189.9882 |
| 1197.1164 | 1208.9136 | 1212.7805 |
| 1214.8663 | 1228.8084 | 1228.9515 |
| 1232.8065 | 1247.6753 | 1249.6390 |
| 1251.4468 | 1251.8506 | 1254.4419 |
| 1265.8111 | 1272.2100 | 1272.4172 |
| 1283.7811 | 1302.1009 | 1310.4003 |
| 1310.8604 | 1316.6871 | 1316.7210 |
| 1329.4567 | 1330.0553 | 1331.2874 |
| 1331.2930 | 1334.3766 | 1338.3706 |
| 1339.9173 | 1339.9615 | 1351.6717 |
| 1352.9465 | 1362.5720 | 1363.2320 |
| 1364.7015 | 1365.2188 | 1370.7392 |
| 1370.8493 | 1371.9956 | 1374.8584 |
| 1382.1633 | 1392.3267 | 1392.3600 |
| 1400.2955 | 1402.4037 | 1402.7335 |
| 1407.0797 | 1412.7356 | 1415.4251 |
| 1415.4841 | 1426.8939 | 1426.8985 |
| 1428.6882 | 1428.6885 | 1443.4467 |
| 1451.3120 | 1472.0398 | 1491.2941 |
| 1491.3118 | 1493.5643 | 1493.7564 |
| 1499.2213 | 1499.2582 | 1500.3999 |
| 1500.4595 | 1503.9245 | 1503.9319 |
| 1507.5253 | 1512.9623 | 1513.7461 |
| 1513.7462 | 1515.2495 | 1515.2506 |
| 1518.1922 | 1518.1928 | 1518.9515 |
| 1522.8063 | 1522.8077 | 1528.5467 |
| 1528.5468 | 1541.1485 | 1541.1554 |
| 1587.3318 | 1590.7356 | 1605.5060 |
| 1613.7091 | 1630.6459 | 1630.6505 |
| 1652.1688 | 1657.5938 | 1657.7622 |
| 1701.3488 | 1701.6820 | 1741.6973 |
| 1745.3523 | 1779.1166 | 1780.3317 |
| 3008.7189 | 3008.7193 | 3015.5145 |
| 3015.5183 | 3017.5330 | 3017.5332 |
| 3021.5163 | 3021.5218 | 3026.3006 |
| 3026.3043 | 3034.8373 | 3034.8577 |
| 3037.8008 | 3037.8041 | 3040.7850 |
| 3040.8025 | 3048.3990 | 3048.3998 |
| 3050.4163 | 3050.4167 | 3073.3838 |
| 3073.3948 | 3076.7932 | 3076.7970 |
| 3079.4852 | 3079.4919 | 3105.9950 |
| 3105.9995 | 3108.6108 | 3108.6144 |

|           |           |           |
|-----------|-----------|-----------|
| 3111.5863 | 3111.5904 | 3115.8270 |
| 3115.8376 | 3175.8998 | 3175.9054 |
| 3181.7494 | 3181.7518 | 3191.3388 |
| 3191.3388 | 3199.2343 | 3199.2354 |
| 3207.7844 | 3207.8074 | 3208.8398 |
| 3208.8652 | 3223.5449 | 3223.5513 |
| 3234.3539 | 3234.5720 | 3259.3787 |
| 3259.4449 | 3268.0974 | 3268.1053 |

## Energies

|                                              |                |              |                    |
|----------------------------------------------|----------------|--------------|--------------------|
| SCF Done: E(RB3LYP) =                        | -3297.19265572 | A.U. after   | 1 cycles           |
| Zero-point correction=                       |                | 0.955502     | (Hartree/Particle) |
| Thermal correction to Energy=                |                | 1.015155     |                    |
| Thermal correction to Enthalpy=              |                | 1.016099     |                    |
| Thermal correction to Gibbs Free Energy=     |                | 0.846913     |                    |
| Sum of electronic and zero-point Energies=   |                | -3296.237154 |                    |
| Sum of electronic and thermal Energies=      |                | -3296.177501 |                    |
| Sum of electronic and thermal Enthalpies=    |                | -3296.176556 |                    |
| Sum of electronic and thermal Free Energies= |                | -3296.345743 |                    |

## RF8H

### Cartesian coordinates

|   |           |           |           |
|---|-----------|-----------|-----------|
| C | -1.834360 | -2.527391 | -0.244909 |
| C | -1.532346 | -1.102318 | -0.123924 |
| C | -0.172944 | -0.685883 | -0.059466 |
| C | 0.898336  | -1.626156 | -0.109057 |
| C | 0.610071  | -3.077644 | -0.227798 |
| C | -2.582106 | -0.142041 | -0.070771 |
| C | 0.172922  | 0.685900  | 0.059318  |
| C | -0.898358 | 1.626174  | 0.108901  |
| C | -2.214645 | 1.230215  | 0.046309  |
| C | -0.610091 | 3.077663  | 0.227618  |
| C | 1.834339  | 2.527409  | 0.244740  |
| C | 1.532324  | 1.102335  | 0.123778  |
| C | 2.582082  | 0.142057  | 0.070646  |
| C | 2.214623  | -1.230199 | -0.046452 |
| H | 2.971252  | -2.004012 | -0.084595 |
| H | -2.971274 | 2.004030  | 0.084441  |
| O | -1.462702 | 3.952230  | 0.275315  |
| O | 2.970736  | 3.013211  | 0.314140  |
| O | -2.970756 | -3.013195 | -0.314299 |
| O | 1.462683  | -3.952207 | -0.275536 |
| N | 0.741785  | 3.391737  | 0.283796  |
| N | -0.741805 | -3.391717 | -0.283981 |
| N | -3.884106 | -0.508188 | -0.127326 |
| H | -4.037164 | -1.505199 | -0.260496 |
| N | 3.884081  | 0.508195  | 0.127252  |
| H | 4.037142  | 1.505212  | 0.260377  |
| C | -5.016813 | 0.403166  | -0.095867 |
| H | -4.950972 | 1.050727  | 0.788872  |
| H | -4.995119 | 1.067187  | -0.972613 |
| C | 5.016785  | -0.403161 | 0.095765  |
| H | 4.950990  | -1.050646 | -0.789036 |
| H | 4.995032  | -1.067261 | 0.972449  |
| C | -6.352165 | -0.362919 | -0.082307 |
| H | -6.354735 | -1.010007 | -0.973000 |
| C | 6.352145  | 0.362913  | 0.082371  |
| H | 6.354612  | 1.009985  | 0.973076  |
| C | -7.511905 | 0.641591  | -0.246998 |
| H | -7.523588 | 1.336733  | 0.603503  |
| H | -7.308212 | 1.258735  | -1.132838 |
| C | -8.900815 | 0.009259  | -0.404424 |

|   |            |           |           |
|---|------------|-----------|-----------|
| H | -8.874739  | -0.728666 | -1.219121 |
| H | -9.168042  | -0.548692 | 0.502309  |
| C | -9.999461  | 1.040876  | -0.692692 |
| H | -10.019765 | 1.782630  | 0.117215  |
| H | -9.743756  | 1.596446  | -1.605127 |
| C | -11.388586 | 0.415022  | -0.847596 |
| H | -11.689758 | -0.113560 | 0.063950  |
| H | -12.148578 | 1.174513  | -1.057268 |
| H | -11.407056 | -0.309528 | -1.669631 |
| C | 7.511858   | -0.641608 | 0.247183  |
| H | 7.308088   | -1.258727 | 1.133022  |
| H | 7.523602   | -1.336774 | -0.603298 |
| C | 8.900762   | -0.009288 | 0.404712  |
| H | 8.874634   | 0.728625  | 1.219418  |
| H | 9.168061   | 0.548673  | -0.501993 |
| C | 9.999379   | -1.040921 | 0.693037  |
| H | 10.019721  | -1.782666 | -0.116876 |
| H | 9.743614   | -1.596496 | 1.605453  |
| C | 11.388503  | -0.415086 | 0.848029  |
| H | 11.406936  | 0.309447  | 1.670079  |
| H | 12.148475  | -1.174590 | 1.057726  |
| H | 11.689730  | 0.113512  | -0.063490 |
| C | 6.498079   | 1.292965  | -1.146393 |
| H | 5.662479   | 2.002327  | -1.155518 |
| H | 7.397248   | 1.904039  | -1.009256 |
| C | 6.568232   | 0.594045  | -2.509685 |
| H | 5.668627   | 0.005100  | -2.716400 |
| H | 6.660004   | 1.334096  | -3.310793 |
| H | 7.430031   | -0.076761 | -2.585096 |
| C | -6.497947  | -1.292960 | 1.146484  |
| H | -7.397152  | -1.904011 | 1.009472  |
| H | -5.662361  | -2.002340 | 1.155494  |
| C | -6.567885  | -0.594042 | 2.509788  |
| H | -6.659537  | -1.334099 | 3.310904  |
| H | -5.668240  | -0.005110 | 2.716367  |
| H | -7.429667  | 0.076770  | 2.585342  |
| H | 0.969414   | 4.376225  | 0.367172  |
| H | -0.969433  | -4.376204 | -0.367377 |

## Frequencies

|          |          |          |
|----------|----------|----------|
| 10.4534  | 17.1085  | 18.7871  |
| 22.6181  | 33.0127  | 42.5132  |
| 44.2178  | 48.4679  | 51.1059  |
| 64.4426  | 66.0869  | 73.3770  |
| 74.5096  | 85.8871  | 103.4520 |
| 105.7680 | 116.0384 | 121.4442 |
| 130.4604 | 141.3913 | 141.7628 |
| 159.1400 | 162.7683 | 169.1785 |
| 175.1760 | 189.5499 | 202.9487 |
| 218.3413 | 229.2486 | 243.7515 |
| 244.0985 | 251.0073 | 255.0059 |
| 260.3971 | 263.8834 | 277.3932 |
| 283.3725 | 285.7626 | 312.8656 |
| 317.8468 | 320.5294 | 357.8332 |
| 365.4464 | 369.8413 | 412.0489 |
| 412.4682 | 421.8307 | 433.8738 |
| 446.5362 | 451.8194 | 462.6042 |
| 478.7050 | 521.0012 | 522.1123 |
| 534.8784 | 537.7200 | 553.2621 |
| 569.3272 | 582.9353 | 617.2126 |
| 621.6126 | 642.9647 | 643.8491 |
| 649.2990 | 662.8535 | 672.5763 |
| 685.9395 | 687.3070 | 715.7188 |
| 730.4689 | 739.8573 | 740.0609 |
| 750.7442 | 757.7458 | 762.5187 |

|           |           |           |
|-----------|-----------|-----------|
| 767.2531  | 770.8716  | 773.0883  |
| 773.2111  | 781.1658  | 781.6778  |
| 782.9084  | 807.5996  | 819.0668  |
| 830.0934  | 904.3336  | 904.3894  |
| 915.8871  | 918.4453  | 930.3110  |
| 934.8896  | 934.9036  | 976.3681  |
| 977.6512  | 977.6969  | 981.9234  |
| 999.5541  | 1001.1325 | 1015.8962 |
| 1035.8964 | 1037.3648 | 1050.8619 |
| 1052.2806 | 1054.0265 | 1065.9160 |
| 1070.1343 | 1072.3329 | 1101.4950 |
| 1101.8607 | 1119.0792 | 1139.6317 |
| 1151.6848 | 1154.6243 | 1155.0506 |
| 1173.6000 | 1176.0990 | 1187.0916 |
| 1187.4742 | 1206.1331 | 1239.5606 |
| 1245.3028 | 1247.7988 | 1259.8255 |
| 1260.0191 | 1273.0275 | 1280.5527 |
| 1285.4388 | 1287.7810 | 1310.6573 |
| 1312.2041 | 1322.1997 | 1322.4236 |
| 1327.5733 | 1336.9277 | 1337.8672 |
| 1339.9265 | 1340.7312 | 1349.8580 |
| 1367.3950 | 1375.7445 | 1381.2007 |
| 1389.4844 | 1391.2308 | 1400.2356 |
| 1400.9249 | 1403.4572 | 1403.9308 |
| 1406.2401 | 1415.0062 | 1416.8306 |
| 1419.3890 | 1420.5032 | 1428.9426 |
| 1428.9610 | 1431.9629 | 1432.3536 |
| 1445.4196 | 1451.7342 | 1468.7575 |
| 1474.0792 | 1498.6991 | 1498.8997 |
| 1501.2926 | 1501.3382 | 1509.2507 |
| 1509.3952 | 1511.7586 | 1511.9932 |
| 1513.9627 | 1513.9634 | 1519.4972 |
| 1520.3085 | 1522.8764 | 1522.9950 |
| 1527.1654 | 1528.7313 | 1528.9252 |
| 1535.7563 | 1536.3804 | 1553.8772 |
| 1578.3872 | 1624.2204 | 1647.4975 |
| 1676.7156 | 1727.5339 | 1731.8990 |
| 1785.0402 | 1787.6254 | 3001.4965 |
| 3001.7105 | 3003.2499 | 3003.2852 |
| 3015.7089 | 3015.7160 | 3019.6874 |
| 3019.6903 | 3028.1464 | 3028.1613 |
| 3038.1492 | 3038.1567 | 3039.5171 |
| 3039.5299 | 3044.4798 | 3044.4817 |
| 3049.1169 | 3049.1235 | 3053.5811 |
| 3053.5833 | 3056.3811 | 3056.4008 |
| 3075.0864 | 3075.1094 | 3082.4538 |
| 3082.5039 | 3106.3660 | 3106.3735 |
| 3112.5132 | 3112.5165 | 3115.8343 |
| 3115.8599 | 3119.8363 | 3119.8801 |
| 3236.8599 | 3237.0872 | 3479.6438 |
| 3482.3198 | 3601.1490 | 3601.3548 |

## Energies

```

SCF Done: E(RB3LYP) = -1687.40759017 A.U. after 1 cycles
Zero-point correction= 0.669154 (Hartree/Particle)
Thermal correction to Energy= 0.707541
Thermal correction to Enthalpy= 0.708486
Thermal correction to Gibbs Free Energy= 0.594161
Sum of electronic and zero-point Energies= -1686.738436
Sum of electronic and thermal Energies= -1686.700049
Sum of electronic and thermal Enthalpies= -1686.699105
Sum of electronic and thermal Free Energies= -1686.813430

```

## RF8a

### Cartesian coordinates

|   |            |           |           |
|---|------------|-----------|-----------|
| C | -2.830735  | -1.169398 | -0.656169 |
| C | -1.856990  | -0.129076 | -0.324239 |
| C | -0.493168  | -0.483027 | -0.161853 |
| C | -0.066073  | -1.829589 | -0.312917 |
| C | -1.043280  | -2.896978 | -0.641580 |
| C | -2.262660  | 1.228172  | -0.161759 |
| C | 0.493173   | 0.483018  | 0.161806  |
| C | 0.066077   | 1.829579  | 0.312875  |
| C | -1.254881  | 2.185536  | 0.154992  |
| C | 1.043283   | 2.896967  | 0.641545  |
| C | 2.830740   | 1.169389  | 0.656126  |
| C | 1.856995   | 0.129068  | 0.324193  |
| C | 2.262664   | -1.228181 | 0.161718  |
| C | 1.254886   | -2.185546 | -0.155030 |
| H | 1.506962   | -3.231637 | -0.273912 |
| H | -1.506958  | 3.231625  | 0.273876  |
| O | 0.714128   | 4.068455  | 0.785590  |
| O | 4.037538   | 0.941471  | 0.834333  |
| O | -4.037543  | -0.941488 | -0.834325 |
| O | -0.714130  | -4.068471 | -0.785596 |
| N | 2.377165   | 2.492743  | 0.780226  |
| N | -2.377164  | -2.492755 | -0.780252 |
| N | -3.556009  | 1.606751  | -0.297496 |
| H | -4.181246  | 0.857232  | -0.585309 |
| N | 3.556015   | -1.606760 | 0.297451  |
| H | 4.181254   | -0.857238 | 0.585253  |
| C | -4.066921  | 2.959178  | -0.148837 |
| H | -3.684384  | 3.401919  | 0.779742  |
| H | -3.710759  | 3.598608  | -0.970782 |
| C | 4.066925   | -2.959188 | 0.148798  |
| H | 3.684380   | -3.401936 | -0.779775 |
| H | 3.710770   | -3.598612 | 0.970750  |
| C | -5.606705  | 2.970497  | -0.132084 |
| H | -5.937187  | 2.488823  | -1.065531 |
| C | 5.606709   | -2.970507 | 0.132031  |
| H | 5.937199   | -2.488824 | 1.065471  |
| C | -6.107109  | 4.429216  | -0.174402 |
| H | -5.764114  | 4.966003  | 0.720577  |
| H | -5.627212  | 4.932600  | -1.025077 |
| C | -7.626927  | 4.588781  | -0.309097 |
| H | -7.980694  | 3.997606  | -1.166097 |
| H | -8.130614  | 4.174569  | 0.573860  |
| C | -8.063921  | 6.048664  | -0.488479 |
| H | -7.701036  | 6.641836  | 0.361925  |
| H | -7.574393  | 6.466118  | -1.378790 |
| C | -9.581275  | 6.212523  | -0.615020 |
| H | -10.096449 | 5.838041  | 0.276877  |
| H | -9.861218  | 7.263028  | -0.743428 |
| H | -9.969157  | 5.657410  | -1.476676 |
| C | 6.107114   | -4.429225 | 0.174357  |
| H | 5.627223   | -4.932602 | 1.025042  |
| H | 5.764111   | -4.966021 | -0.720613 |
| C | 7.626933   | -4.588789 | 0.309042  |
| H | 7.980706   | -3.997605 | 1.166033  |
| H | 8.130612   | -4.174586 | -0.573924 |
| C | 8.063928   | -6.048670 | 0.488434  |
| H | 7.701036   | -6.641850 | -0.361961 |
| H | 7.574407   | -6.466115 | 1.378753  |
| C | 9.581283   | -6.212528 | 0.614964  |
| H | 9.969173   | -5.657406 | 1.476611  |
| H | 9.861227   | -7.263031 | 0.743381  |
| H | 10.096449  | -5.838055 | -0.276941 |

|   |           |           |           |
|---|-----------|-----------|-----------|
| C | 6.194513  | -2.137707 | -1.032464 |
| H | 5.824457  | -1.109255 | -0.950042 |
| H | 7.279717  | -2.071037 | -0.895168 |
| C | 5.897077  | -2.659227 | -2.443755 |
| H | 4.822222  | -2.700373 | -2.648613 |
| H | 6.343114  | -1.998783 | -3.193987 |
| H | 6.305330  | -3.661732 | -2.608171 |
| C | -6.194520 | 2.137688  | 1.032398  |
| H | -7.279724 | 2.071022  | 0.895094  |
| H | -5.824467 | 1.109235  | 0.949968  |
| C | -5.897092 | 2.659192  | 2.443696  |
| H | -6.343136 | 1.998740  | 3.193919  |
| H | -4.822238 | 2.700332  | 2.648563  |
| H | -6.305344 | 3.661696  | 2.608120  |
| C | 3.377841  | 3.515978  | 1.145944  |
| H | 4.006619  | 3.078706  | 1.923504  |
| H | 2.816236  | 4.353046  | 1.561956  |
| C | -3.377847 | -3.515997 | -1.145931 |
| H | -4.006632 | -3.078741 | -1.923496 |
| H | -2.816250 | -4.353077 | -1.561928 |
| C | 4.274362  | 3.996215  | -0.015670 |
| H | 4.821178  | 3.117659  | -0.381007 |
| C | 5.305269  | 5.009116  | 0.552298  |
| H | 5.317049  | 4.946060  | 1.649416  |
| H | 4.977842  | 6.032511  | 0.322785  |
| C | 6.744097  | 4.804346  | 0.056092  |
| H | 7.074306  | 3.792765  | 0.331289  |
| H | 6.772884  | 4.841774  | -1.040393 |
| C | 7.732760  | 5.830822  | 0.622267  |
| H | 7.700395  | 5.796990  | 1.719943  |
| H | 7.405573  | 6.841514  | 0.342067  |
| C | 9.172007  | 5.610523  | 0.147133  |
| H | 9.852210  | 6.358335  | 0.567699  |
| H | 9.540334  | 4.621930  | 0.444095  |
| H | 9.243236  | 5.673504  | -0.944753 |
| C | 3.442859  | 4.568926  | -1.180397 |
| H | 2.712121  | 3.815085  | -1.496839 |
| H | 2.855603  | 5.421077  | -0.814584 |
| C | 4.259059  | 4.993774  | -2.405909 |
| H | 4.943448  | 5.817069  | -2.177971 |
| H | 4.857264  | 4.161966  | -2.795493 |
| H | 3.599408  | 5.332584  | -3.211546 |
| C | -4.274360 | -3.996197 | 0.015706  |
| H | -4.821161 | -3.117627 | 0.381029  |
| C | -5.305285 | -5.009101 | -0.552223 |
| H | -5.317093 | -4.946061 | -1.649342 |
| H | -4.977856 | -6.032494 | -0.322704 |
| C | -6.744098 | -4.804319 | -0.055979 |
| H | -7.074311 | -3.792740 | -0.331179 |
| H | -6.772852 | -4.841732 | 1.040508  |
| C | -7.732781 | -5.830799 | -0.622110 |
| H | -7.700449 | -5.796982 | -1.719788 |
| H | -7.405590 | -6.841488 | -0.341907 |
| C | -9.172013 | -5.610489 | -0.146937 |
| H | -9.540346 | -4.621898 | -0.443901 |
| H | -9.852231 | -6.358305 | -0.567472 |
| H | -9.243210 | -5.673455 | 0.944952  |
| C | -3.442851 | -4.568890 | 1.180438  |
| H | -2.855605 | -5.421053 | 0.814638  |
| H | -2.712105 | -3.815049 | 1.496860  |
| C | -4.259049 | -4.993708 | 2.405962  |
| H | -4.857236 | -4.161884 | 2.795540  |
| H | -4.943455 | -5.816994 | 2.178040  |
| H | -3.599397 | -5.332519 | 3.211598  |

## Frequencies

|           |           |           |
|-----------|-----------|-----------|
| 7.2379    | 10.5628   | 13.7320   |
| 15.5415   | 16.3986   | 18.1360   |
| 24.1025   | 25.1647   | 26.1056   |
| 27.4933   | 28.0888   | 42.0014   |
| 44.5113   | 49.9168   | 52.5454   |
| 56.5041   | 56.9371   | 72.8594   |
| 74.5160   | 75.7766   | 76.8527   |
| 78.1260   | 79.6903   | 86.3621   |
| 102.5460  | 105.3802  | 105.5098  |
| 111.9501  | 114.0791  | 121.7344  |
| 123.2917  | 125.0056  | 128.8258  |
| 130.1873  | 130.1894  | 142.5663  |
| 143.7402  | 145.7157  | 146.9386  |
| 169.7595  | 172.2770  | 183.2990  |
| 184.5468  | 199.3481  | 203.3772  |
| 217.9927  | 224.3277  | 228.3427  |
| 236.9338  | 242.9214  | 243.6771  |
| 248.8462  | 249.8683  | 253.9715  |
| 256.1017  | 258.9463  | 260.9664  |
| 262.8088  | 274.8714  | 276.7998  |
| 278.8956  | 280.3498  | 312.0987  |
| 314.9817  | 318.6507  | 323.3473  |
| 332.2310  | 349.2119  | 357.1245  |
| 366.4395  | 368.1457  | 370.7693  |
| 375.4424  | 387.2201  | 405.1541  |
| 410.3272  | 421.4141  | 433.5423  |
| 441.5122  | 446.3141  | 451.8172  |
| 457.4294  | 461.0047  | 470.0636  |
| 481.7768  | 501.9189  | 511.7043  |
| 525.0707  | 525.2976  | 536.4161  |
| 552.5928  | 560.3906  | 561.1240  |
| 572.4879  | 582.0066  | 619.0598  |
| 622.1661  | 652.2794  | 653.2589  |
| 656.6739  | 664.8671  | 666.8974  |
| 687.3867  | 729.8624  | 731.0486  |
| 734.4103  | 734.4594  | 740.4187  |
| 740.6607  | 744.3551  | 758.9337  |
| 760.3458  | 765.4261  | 771.7965  |
| 772.1089  | 780.9518  | 781.2776  |
| 781.9779  | 782.0937  | 782.3675  |
| 785.1143  | 799.7936  | 809.2755  |
| 818.3786  | 821.6439  | 826.5967  |
| 849.3891  | 903.8692  | 905.1368  |
| 905.3338  | 906.2232  | 915.1517  |
| 915.6217  | 918.5019  | 921.3625  |
| 934.1782  | 934.4732  | 937.1204  |
| 940.3698  | 961.5572  | 963.6849  |
| 973.3942  | 974.1421  | 977.4099  |
| 980.2731  | 986.2413  | 986.6150  |
| 1000.8781 | 1001.1545 | 1009.2071 |
| 1015.4482 | 1034.5785 | 1035.3241 |
| 1036.9334 | 1040.3213 | 1040.8396 |
| 1047.9903 | 1052.3955 | 1053.1609 |
| 1063.2198 | 1066.3036 | 1066.7393 |
| 1067.2973 | 1069.0401 | 1069.4472 |
| 1074.6472 | 1085.6898 | 1099.3107 |
| 1100.8937 | 1101.1496 | 1121.2390 |
| 1134.3547 | 1136.0561 | 1147.8989 |
| 1148.2652 | 1151.1477 | 1152.7095 |
| 1156.3452 | 1166.8718 | 1168.5507 |
| 1178.3745 | 1181.8444 | 1185.8235 |
| 1186.4564 | 1196.9691 | 1197.3007 |
| 1215.9900 | 1225.6922 | 1236.9949 |
| 1243.8229 | 1245.4298 | 1252.7740 |

|           |           |           |
|-----------|-----------|-----------|
| 1253.0453 | 1257.2159 | 1257.5730 |
| 1278.5175 | 1279.1757 | 1279.5228 |
| 1282.9383 | 1286.4266 | 1308.6015 |
| 1309.0640 | 1310.6201 | 1312.6735 |
| 1322.2776 | 1322.4644 | 1325.2939 |
| 1325.6288 | 1326.0907 | 1332.9176 |
| 1333.4152 | 1336.0943 | 1337.6554 |
| 1339.9563 | 1340.1715 | 1341.7983 |
| 1342.0881 | 1352.2706 | 1353.8385 |
| 1357.5386 | 1363.5718 | 1376.6964 |
| 1376.9340 | 1384.4298 | 1384.8671 |
| 1389.0358 | 1389.0524 | 1394.7100 |
| 1395.1850 | 1398.7413 | 1400.5265 |
| 1403.1472 | 1403.8095 | 1410.3047 |
| 1410.8656 | 1415.1789 | 1415.4664 |
| 1416.6512 | 1416.7891 | 1419.6447 |
| 1419.8666 | 1424.6317 | 1427.3596 |
| 1427.3981 | 1429.9030 | 1429.9207 |
| 1430.2729 | 1430.2853 | 1434.7553 |
| 1434.9267 | 1439.6435 | 1450.4122 |
| 1470.6102 | 1473.2495 | 1480.4328 |
| 1485.1439 | 1496.3952 | 1496.4257 |
| 1498.3379 | 1498.5554 | 1500.3335 |
| 1500.3377 | 1501.5877 | 1501.6196 |
| 1503.7394 | 1503.7413 | 1507.2000 |
| 1507.3232 | 1511.7050 | 1511.8680 |
| 1514.7399 | 1514.7409 | 1515.0785 |
| 1515.0793 | 1515.8161 | 1515.8167 |
| 1519.0857 | 1519.0872 | 1519.1171 |
| 1519.9538 | 1522.1543 | 1522.2070 |
| 1523.6838 | 1523.6851 | 1527.1750 |
| 1528.1978 | 1528.3300 | 1528.3356 |
| 1528.4519 | 1532.8839 | 1533.5814 |
| 1549.7018 | 1585.9531 | 1622.3054 |
| 1643.2909 | 1667.2666 | 1690.8503 |
| 1703.1859 | 1755.6321 | 1757.5790 |
| 2996.7655 | 2996.9391 | 3000.4865 |
| 3000.5441 | 3014.0975 | 3014.1014 |
| 3015.4291 | 3015.4340 | 3018.7369 |
| 3018.7386 | 3019.4010 | 3019.4042 |
| 3027.0456 | 3027.0531 | 3027.4563 |
| 3027.4685 | 3036.0511 | 3036.0691 |
| 3037.2858 | 3037.2878 | 3038.3534 |
| 3038.3636 | 3039.8832 | 3039.9178 |
| 3042.3130 | 3042.3176 | 3042.6036 |
| 3042.6049 | 3045.2703 | 3045.2721 |
| 3047.5815 | 3047.5840 | 3048.6476 |
| 3048.6552 | 3050.3244 | 3050.3319 |
| 3053.0911 | 3053.0924 | 3056.6467 |
| 3056.6683 | 3074.6849 | 3074.6902 |
| 3074.9694 | 3074.9971 | 3075.9589 |
| 3075.9596 | 3081.9213 | 3081.9652 |
| 3097.7353 | 3097.7716 | 3105.3787 |
| 3105.3885 | 3106.4807 | 3106.4886 |
| 3107.1964 | 3107.2034 | 3110.2112 |
| 3110.2192 | 3112.4405 | 3112.4445 |
| 3115.0411 | 3115.0555 | 3116.4410 |
| 3116.4470 | 3117.8196 | 3117.8753 |
| 3159.2024 | 3159.2035 | 3240.4471 |
| 3240.6792 | 3474.0433 | 3476.8117 |

## Energies

SCF Done: E(RB3LYP) = -2316.45413317 A.U. after 1 cycles  
 Zero-point correction= 1.123729 (Hartree/Particle)  
 Thermal correction to Energy= 1.184144



|                                              |              |
|----------------------------------------------|--------------|
| Thermal correction to Enthalpy=              | 1.185089     |
| Thermal correction to Gibbs Free Energy=     | 1.018206     |
| Sum of electronic and zero-point Energies=   | -2315.330405 |
| Sum of electronic and thermal Energies=      | -2315.269989 |
| Sum of electronic and thermal Enthalpies=    | -2315.269045 |
| Sum of electronic and thermal Free Energies= | -2315.435927 |

## RF8b

### Cartesian coordinates

|   |           |           |           |
|---|-----------|-----------|-----------|
| C | -2.795807 | -1.398083 | -0.157619 |
| C | -1.867967 | -0.274647 | -0.138313 |
| C | -0.472178 | -0.517085 | -0.090313 |
| C | 0.028051  | -1.843773 | -0.058142 |
| C | -0.889430 | -3.009255 | -0.074749 |
| C | -2.349941 | 1.069938  | -0.156475 |
| C | 0.470321  | 0.539095  | -0.064843 |
| C | -0.030154 | 1.865970  | -0.093302 |
| C | -1.383377 | 2.117866  | -0.137456 |
| C | 0.887841  | 3.031249  | -0.080608 |
| C | 2.793959  | 1.419827  | 0.010834  |
| C | 1.865976  | 0.296506  | -0.012221 |
| C | 2.347444  | -1.047800 | 0.021336  |
| C | 1.380823  | -2.095484 | -0.002730 |
| H | 1.694401  | -3.130727 | 0.027259  |
| H | -1.697825 | 3.153016  | -0.165123 |
| O | 0.461973  | 4.177957  | -0.110236 |
| O | 4.021180  | 1.272837  | 0.064670  |
| O | -4.023666 | -1.251548 | -0.203414 |
| O | -0.463278 | -4.155958 | -0.048614 |
| C | 3.249041  | 3.782919  | -0.019681 |
| C | -3.250486 | -3.761356 | -0.135580 |
| H | -4.238113 | -3.327082 | -0.170734 |
| H | 4.236496  | 3.348440  | 0.018233  |
| C | -3.075124 | -5.094663 | -0.112403 |
| C | 3.074131  | 5.116202  | -0.047182 |
| H | -2.078812 | -5.509685 | -0.083132 |
| H | 2.077968  | 5.531465  | -0.078240 |
| N | 2.268147  | 2.751977  | -0.032209 |
| N | -2.269821 | -2.730178 | -0.121132 |
| N | -3.670534 | 1.361665  | -0.188330 |
| H | -4.278621 | 0.550287  | -0.254584 |
| N | 3.667238  | -1.342103 | 0.073163  |
| H | 4.277104  | -0.532365 | 0.142866  |
| C | -4.247114 | 2.696793  | -0.168710 |
| H | -3.808559 | 3.279456  | 0.652060  |
| H | -4.005182 | 3.232124  | -1.098794 |
| C | 4.229135  | -2.681403 | 0.155614  |
| H | 3.853063  | -3.296360 | -0.672814 |
| H | 3.902668  | -3.172677 | 1.084074  |
| C | -5.777329 | 2.638578  | -0.004582 |
| H | -6.163274 | 2.034286  | -0.840173 |
| C | 5.767770  | -2.644960 | 0.122110  |
| H | 6.086057  | -1.981566 | 0.941168  |
| C | -4.177430 | -6.067663 | -0.127764 |
| C | -3.847509 | -7.435457 | -0.139407 |
| C | -5.543667 | -5.724151 | -0.129706 |
| C | -4.833331 | -8.420268 | -0.155426 |
| H | -2.799219 | -7.722359 | -0.136606 |
| C | -6.528227 | -6.706737 | -0.145950 |
| H | -5.844612 | -4.681230 | -0.115677 |
| C | -6.180821 | -8.060917 | -0.159271 |
| H | -4.547442 | -9.468243 | -0.164635 |
| H | -7.574852 | -6.415367 | -0.146797 |

|   |            |           |           |
|---|------------|-----------|-----------|
| H | -6.953168  | -8.824208 | -0.171178 |
| C | 4.176760   | 6.088865  | -0.033982 |
| C | 5.542880   | 5.744890  | -0.034627 |
| C | 3.847319   | 7.456771  | -0.021963 |
| C | 6.527802   | 6.727144  | -0.020042 |
| H | 5.843421   | 4.701868  | -0.049789 |
| C | 4.833501   | 8.441247  | -0.007643 |
| H | 2.799123   | 7.744030  | -0.023028 |
| C | 6.180876   | 8.081440  | -0.006047 |
| H | 7.574329   | 6.435423  | -0.021255 |
| H | 4.547985   | 9.489320  | 0.001941  |
| H | 6.953500   | 8.844472  | 0.004447  |
| C | -6.359546  | 4.058397  | -0.165846 |
| H | -5.962242  | 4.715006  | 0.620214  |
| H | -5.992595  | 4.474756  | -1.114121 |
| C | -7.891847  | 4.133627  | -0.161796 |
| H | -8.293067  | 3.430022  | -0.905429 |
| H | -8.283295  | 3.804700  | 0.809574  |
| C | -8.425681  | 5.541073  | -0.458779 |
| H | -8.013382  | 6.246483  | 0.275490  |
| H | -8.052546  | 5.871226  | -1.437740 |
| C | -9.954852  | 5.621840  | -0.441138 |
| H | -10.356143 | 5.336523  | 0.537951  |
| H | -10.304142 | 6.635942  | -0.660078 |
| H | -10.396021 | 4.950302  | -1.186376 |
| C | 6.312772   | -4.052544 | 0.441130  |
| H | 5.859779   | -4.389776 | 1.383598  |
| H | 5.972153   | -4.763778 | -0.323609 |
| C | 7.838362   | -4.143818 | 0.575075  |
| H | 8.187785   | -3.383439 | 1.288352  |
| H | 8.317648   | -3.904863 | -0.382997 |
| C | 8.316616   | -5.526562 | 1.037431  |
| H | 7.958729   | -6.287662 | 0.330776  |
| H | 7.849481   | -5.766210 | 2.002167  |
| C | 9.839241   | -5.626088 | 1.167471  |
| H | 10.223544  | -4.900204 | 1.893031  |
| H | 10.147986  | -6.622489 | 1.499427  |
| H | 10.333126  | -5.427196 | 0.209605  |
| C | 6.325234   | -2.037914 | -1.187788 |
| H | 5.919064   | -1.027056 | -1.311108 |
| H | 7.406811   | -1.905397 | -1.071285 |
| C | 6.052650   | -2.839285 | -2.466722 |
| H | 4.981052   | -2.955235 | -2.659417 |
| H | 6.481777   | -2.326828 | -3.333344 |
| H | 6.494239   | -3.840376 | -2.427906 |
| C | -6.211427  | 1.926453  | 1.299357  |
| H | -7.300471  | 1.807429  | 1.278837  |
| H | -5.806849  | 0.907615  | 1.298981  |
| C | -5.804857  | 2.618256  | 2.606206  |
| H | -6.159545  | 2.042137  | 3.466490  |
| H | -4.717857  | 2.705902  | 2.703265  |
| H | -6.228750  | 3.624116  | 2.689920  |

## Frequencies

|          |          |          |
|----------|----------|----------|
| 6.5534   | 9.8686   | 11.5779  |
| 17.6193  | 20.8526  | 23.4110  |
| 24.1613  | 24.2123  | 25.9780  |
| 30.3185  | 35.2066  | 39.7534  |
| 46.7795  | 50.6077  | 58.1802  |
| 59.6635  | 62.1500  | 66.9698  |
| 68.4305  | 69.6999  | 71.1207  |
| 93.5708  | 97.8644  | 104.6293 |
| 112.1315 | 118.4172 | 127.9592 |
| 128.8524 | 130.2415 | 136.2103 |
| 138.0630 | 146.7390 | 151.2957 |

|           |           |           |
|-----------|-----------|-----------|
| 165.7722  | 183.8248  | 191.6538  |
| 199.2887  | 212.2588  | 218.4735  |
| 226.9866  | 233.4209  | 237.0107  |
| 239.6448  | 243.5184  | 250.9074  |
| 253.8629  | 256.9314  | 258.1280  |
| 275.1317  | 279.0736  | 282.6481  |
| 315.1105  | 315.6696  | 324.6928  |
| 347.3833  | 357.1638  | 368.6010  |
| 374.2234  | 383.7123  | 386.1253  |
| 413.4603  | 413.8962  | 419.3261  |
| 423.4163  | 431.5514  | 444.4631  |
| 446.5099  | 451.0380  | 460.3096  |
| 471.7327  | 504.8123  | 516.2867  |
| 517.0684  | 518.5737  | 527.9616  |
| 528.7299  | 529.1070  | 549.9425  |
| 550.5689  | 570.3086  | 570.6501  |
| 575.5915  | 611.1092  | 614.0069  |
| 633.1899  | 634.5099  | 634.5417  |
| 645.0932  | 653.6668  | 654.1070  |
| 663.3434  | 672.2432  | 685.3022  |
| 704.0363  | 704.5478  | 723.1371  |
| 733.3052  | 735.0366  | 738.8016  |
| 739.6688  | 748.6050  | 754.8912  |
| 767.9079  | 769.4823  | 769.5414  |
| 770.0782  | 772.4830  | 778.3824  |
| 783.2118  | 806.9343  | 818.2256  |
| 825.5582  | 838.4462  | 849.0005  |
| 849.0166  | 876.1309  | 880.1383  |
| 880.1593  | 899.2124  | 904.4303  |
| 905.7460  | 916.9237  | 919.9035  |
| 923.3903  | 923.4180  | 934.7353  |
| 934.9854  | 937.6775  | 943.4339  |
| 968.2764  | 968.2771  | 976.5224  |
| 976.8908  | 982.6901  | 983.7923  |
| 992.8408  | 992.8464  | 1001.5935 |
| 1001.9762 | 1013.4825 | 1013.5822 |
| 1023.3968 | 1023.4848 | 1036.7701 |
| 1037.1626 | 1043.9665 | 1052.1052 |
| 1053.4878 | 1057.7332 | 1058.9782 |
| 1059.9627 | 1070.6373 | 1073.9026 |
| 1101.7958 | 1102.0572 | 1103.4442 |
| 1111.5687 | 1118.8473 | 1119.3580 |
| 1140.2539 | 1148.9869 | 1154.7676 |
| 1156.4391 | 1162.9117 | 1170.9681 |
| 1175.1457 | 1185.2514 | 1185.7304 |
| 1187.7063 | 1187.7294 | 1206.7675 |
| 1211.9484 | 1213.1339 | 1215.1815 |
| 1228.0868 | 1244.9155 | 1245.9180 |
| 1253.4213 | 1259.4364 | 1261.2902 |
| 1263.4319 | 1280.0330 | 1285.8889 |
| 1288.4675 | 1310.1207 | 1312.2899 |
| 1322.1928 | 1323.1233 | 1324.0444 |
| 1331.3373 | 1331.5816 | 1337.5942 |
| 1338.1351 | 1340.5777 | 1341.3015 |
| 1354.6877 | 1358.1636 | 1364.2558 |
| 1366.2341 | 1370.9053 | 1371.0245 |
| 1376.0716 | 1378.2964 | 1388.7930 |
| 1391.3561 | 1396.4592 | 1397.9714 |
| 1401.2081 | 1401.9190 | 1402.7521 |
| 1405.5617 | 1416.1184 | 1418.7251 |
| 1419.6819 | 1427.9711 | 1430.0022 |
| 1430.6980 | 1433.0895 | 1435.4633 |
| 1447.9674 | 1474.4731 | 1476.1782 |
| 1491.8901 | 1491.9013 | 1497.4667 |
| 1498.0217 | 1500.7836 | 1500.9980 |
| 1507.1712 | 1508.2147 | 1510.8291 |

|           |           |           |
|-----------|-----------|-----------|
| 1511.1150 | 1513.0934 | 1515.7668 |
| 1517.7761 | 1519.0036 | 1521.6216 |
| 1521.7053 | 1526.7189 | 1527.2090 |
| 1527.7292 | 1534.4105 | 1535.4020 |
| 1541.3217 | 1541.3321 | 1552.4318 |
| 1587.4046 | 1618.7758 | 1630.8973 |
| 1630.9346 | 1640.3742 | 1657.6266 |
| 1657.7328 | 1669.3754 | 1698.6194 |
| 1701.5772 | 1701.7991 | 1710.2995 |
| 1757.0005 | 1757.5193 | 3000.6092 |
| 3000.8347 | 3002.8511 | 3003.2989 |
| 3015.4507 | 3015.5889 | 3019.3824 |
| 3019.8491 | 3027.6107 | 3028.1999 |
| 3037.9425 | 3038.8142 | 3041.4198 |
| 3042.1037 | 3044.9431 | 3045.1013 |
| 3048.6110 | 3049.1725 | 3052.1985 |
| 3053.3945 | 3056.1083 | 3056.2657 |
| 3074.6971 | 3075.0896 | 3080.5556 |
| 3082.6052 | 3106.1863 | 3106.9530 |
| 3112.5833 | 3113.0495 | 3116.3781 |
| 3116.4484 | 3118.7760 | 3118.8486 |
| 3174.5251 | 3174.5344 | 3180.0335 |
| 3180.0399 | 3190.1159 | 3190.1202 |
| 3197.6740 | 3197.6804 | 3206.8166 |
| 3206.8449 | 3244.5313 | 3245.5008 |
| 3263.2457 | 3263.4487 | 3272.0965 |
| 3272.2008 | 3499.3338 | 3502.2298 |

## Energies

```

SCF Done: E(RB3LYP) = -2304.31399777 A.U. after 1 cycles
Zero-point correction= 0.896659 (Hartree/Particle)
Thermal correction to Energy= 0.949361
Thermal correction to Enthalpy= 0.950305
Thermal correction to Gibbs Free Energy= 0.799203
Sum of electronic and zero-point Energies= -2303.417339
Sum of electronic and thermal Energies= -2303.364637
Sum of electronic and thermal Enthalpies= -2303.363693
Sum of electronic and thermal Free Energies= -2303.514795

```

## Reference

- S1) A. J. Owen, “Quantitative UV-Visible Analysis in the Presence of Scattering”, Agilent Technologies Application Note, 1995, Publication number 5963-3940E
- S2) M. J. Frisch, G. W. T, H. B. Schlegel, G. E. Scuseria, M. A. Robb, J. R. Cheeseman, G. Scalmani, V. Barone, B. Mennucci, G. A. Petersson, H. Nakatsuji, M. Caricato, X. Li, H. P. Hratchian, A. F. Izmaylov, J. Bloino, G. Zheng, J. L. Sonnenberg, M. Hada, M. Ehara, K. Toyota, R. Fukuda, J. Hasegawa, M. Ishida, T. Nakajima, Y. Honda, O. Kitao, H. Nakai, T. Vreven, J. A. Montgomery, Jr, J. E. Peralta, F. Ogliaro, M. Bearpark, J. J. Heyd, E. Brothers, K. N. Kudin, V. N. Staroverov, R. Kobayashi, J. Normand, K. Raghavachari, A. Rendell, J. C. Burant, S. S. Iyengar, J. Tomasi, M. Cossi, N. Rega, J. M. Millam, M. Klene, J. E. Knox, J. B. Cross, V. Bakken, C. Adamo, J. Jaramillo, R. Gomperts, R. E. Stratmann, O. Yazyev, A. J. Austin, R. Cammi, C. Pomelli, J. W. Ochterski, R. L. Martin, K. Morokuma, V. G. Zakrzewski, G. A. Voth, P. Salvador, J. J. Dannenberg, S. Dapprich, A. D. Daniels, Ö. Farkas, J. B. Foresman, J. V. Ortiz, J. Cioslowski, D. J. Fox In *Gaussian, Inc.* Wallingford CT, 9
